# Supplementary material for: Simple chiral sulfonamide primary amine catalysed highly enantioselective Michael addition of malonates to enones
Source: Royal Society of Chemistry journal article supplement (doi:10.1039/c2ob07191f), 2012-01-01
Supplement: c2ob07191f.pdf [file c2ob07191f.pdf]

# **Simple Chiral Sulfonamide Primary Amine Catalysed Highly Enantioselective Michael Addition of Malonates to Enones**

Chunhua Luo, Yu Jin and Da-Ming Du\*

School of Chemical Engineering and Environment, Beijing Institute of Technology,  
Beijing 100081, People's Republic of China

Fax: (+86)-10-68914985; E-mail: [dudm@bit.edu.cn](mailto:dudm@bit.edu.cn)

## ***Supporting Information***

### **Contents**

|                                                                              |    |
|------------------------------------------------------------------------------|----|
| Copies of $^1\text{H}$ and $^{13}\text{C}$ NMR spectra of new compounds..... | S1 |
| Copies of HPLC chromatograms of Michael addition products.....               | S7 |

# Copies of $^1\text{H}$ and $^{13}\text{C}$ NMR spectra of new compounds

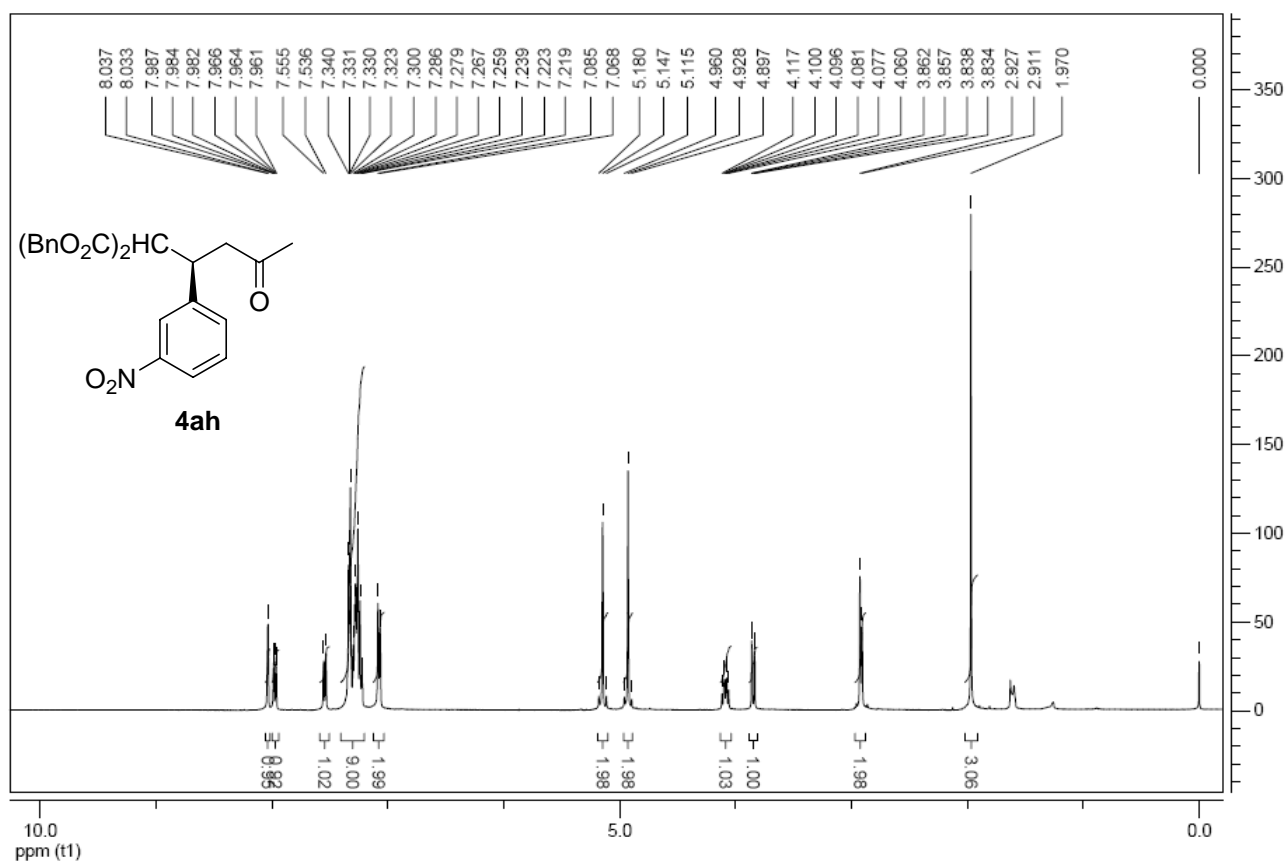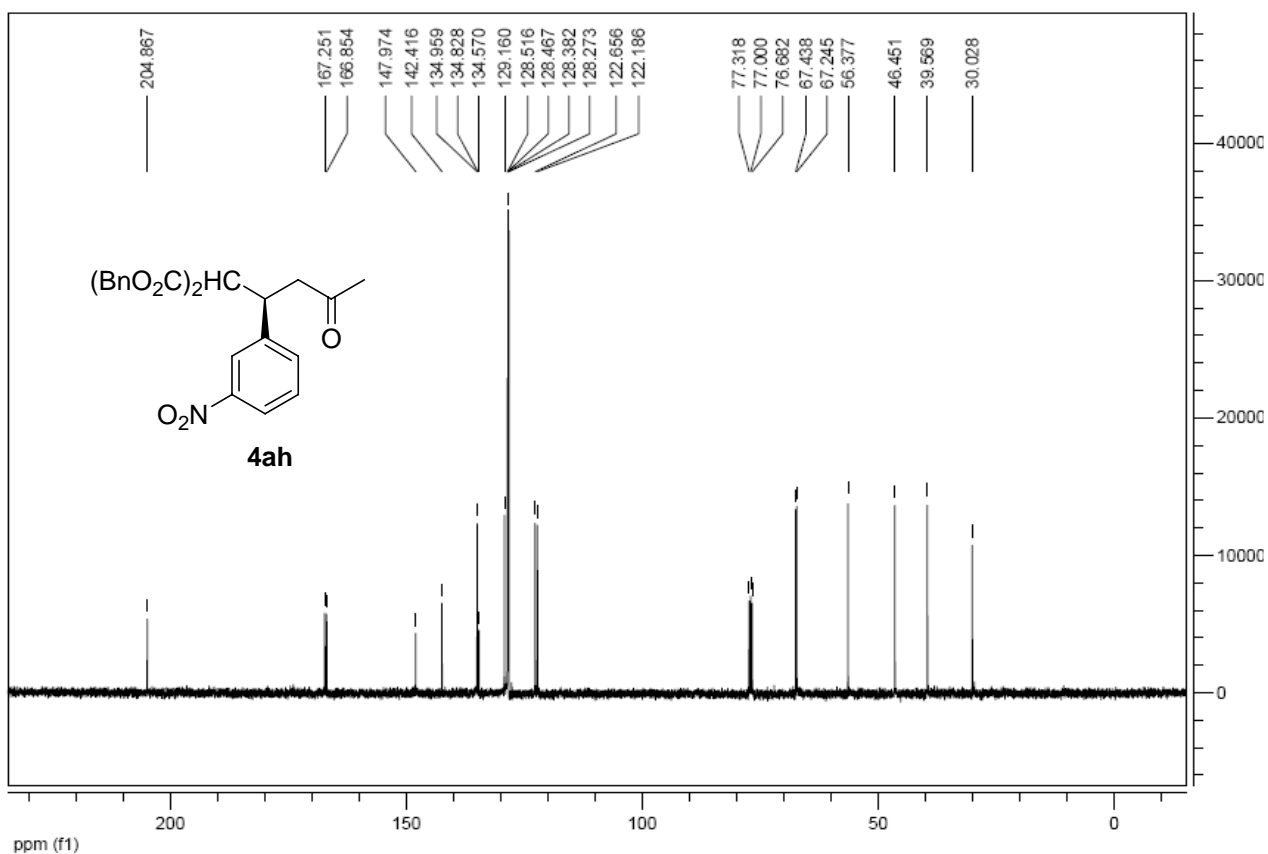

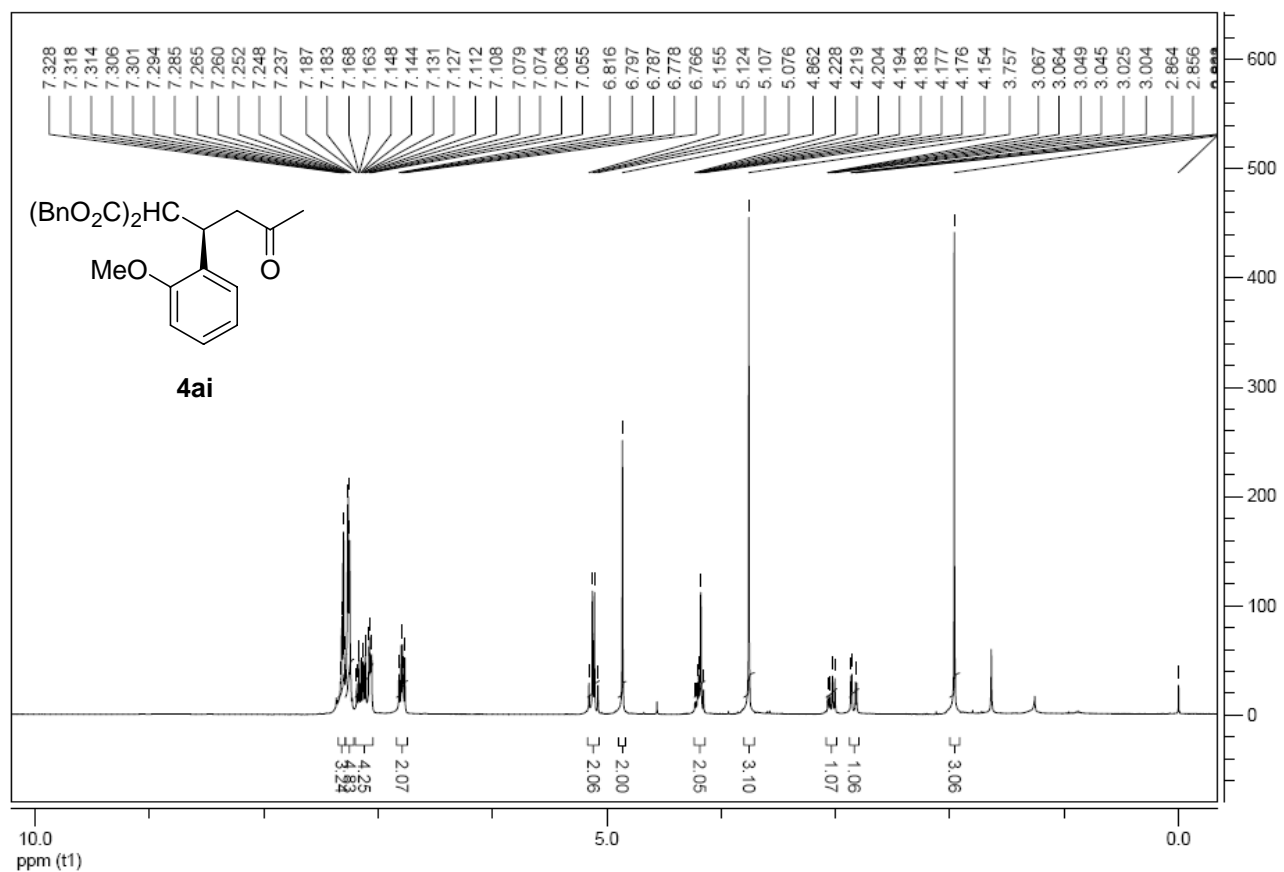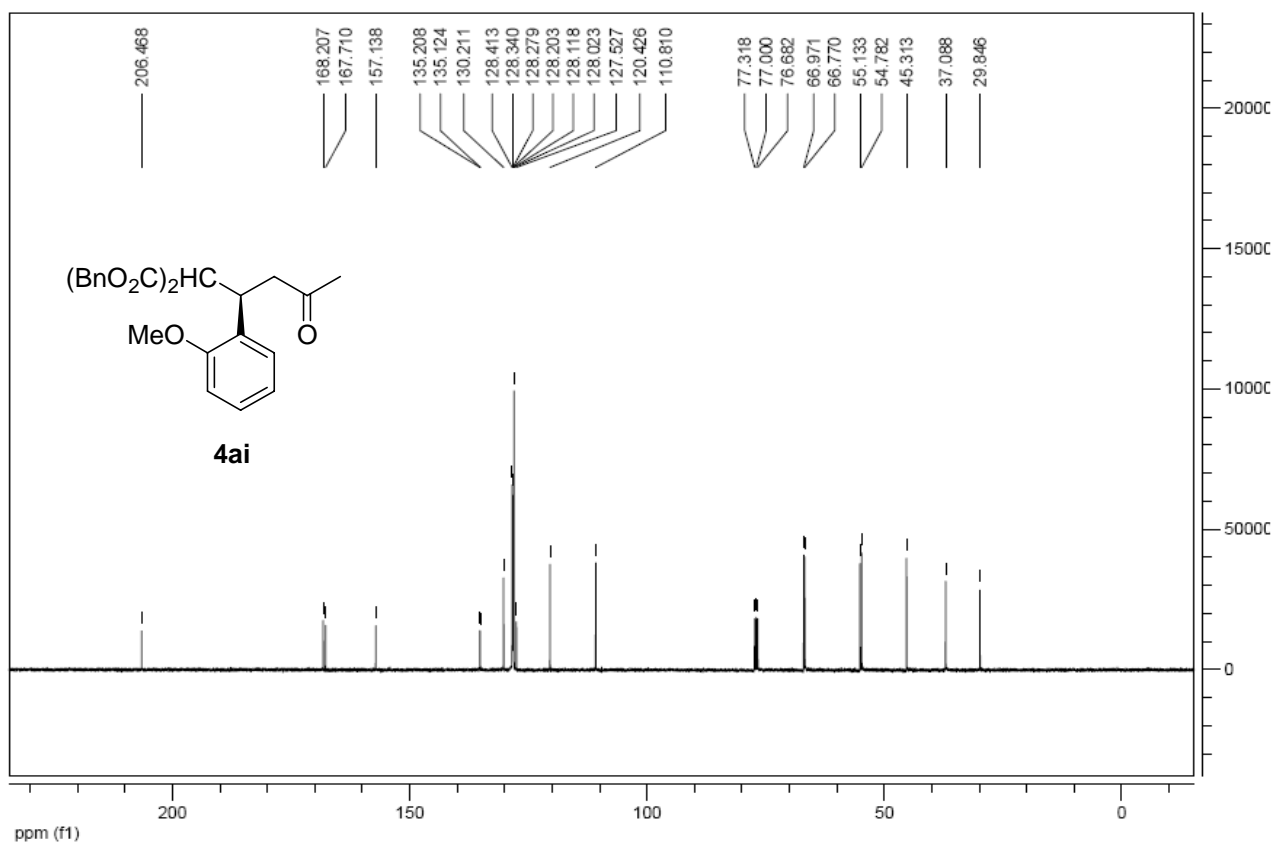

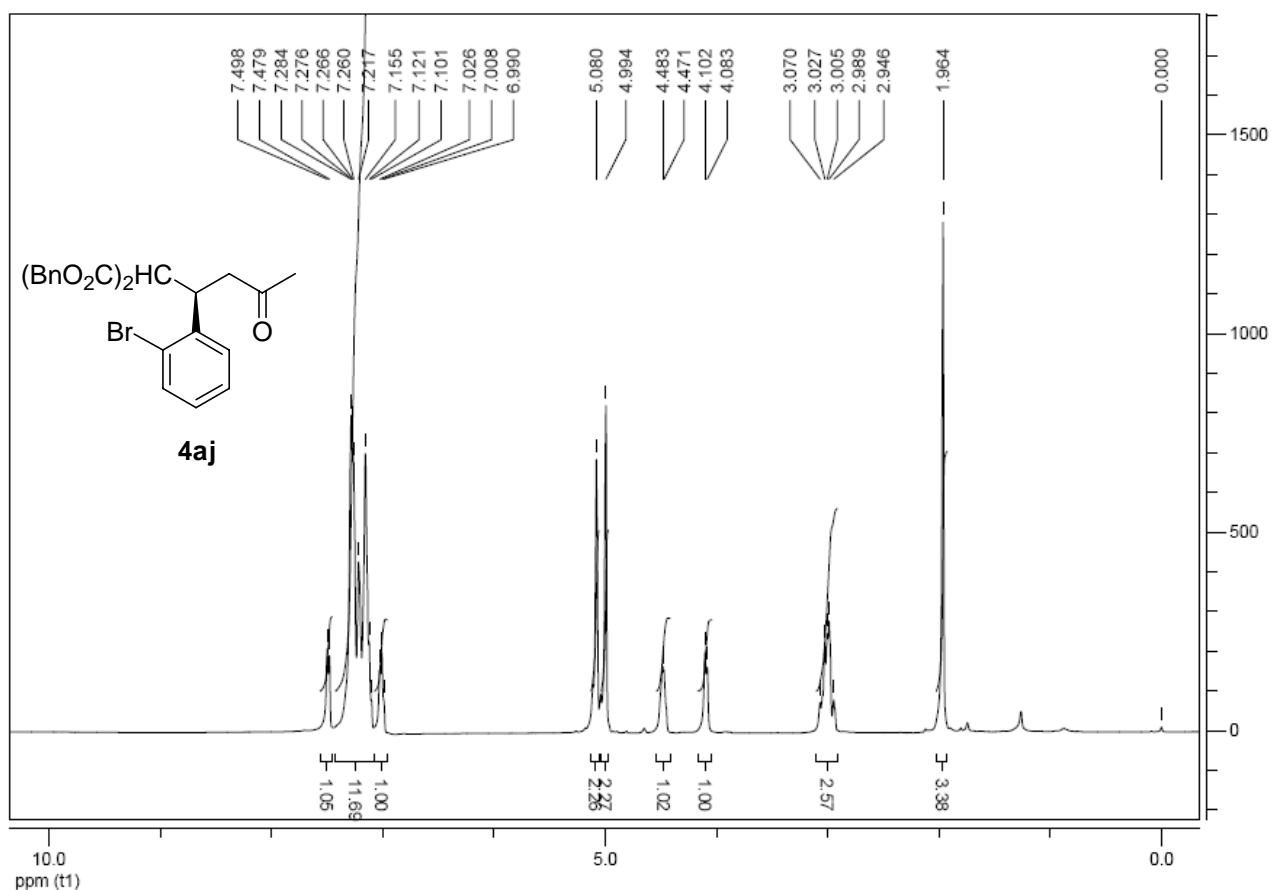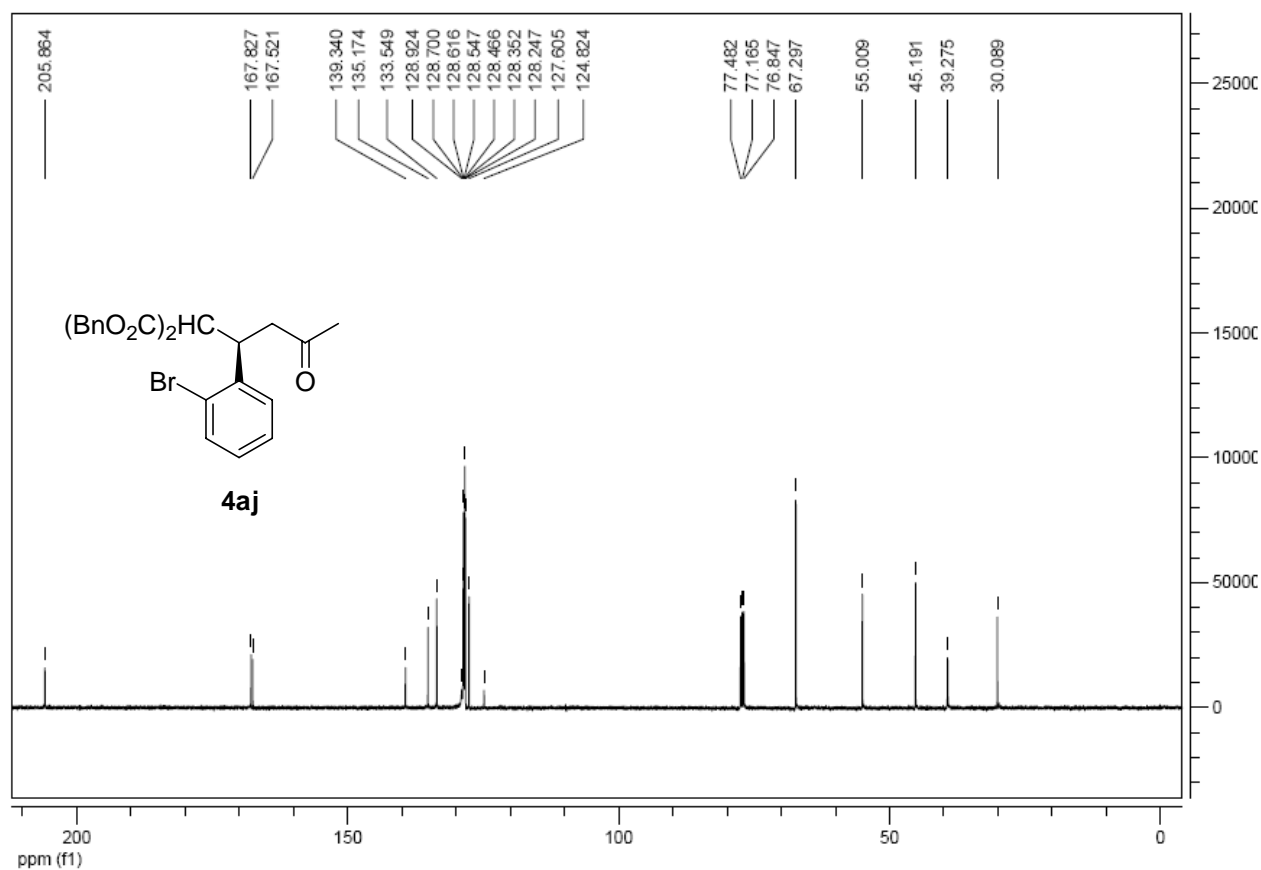

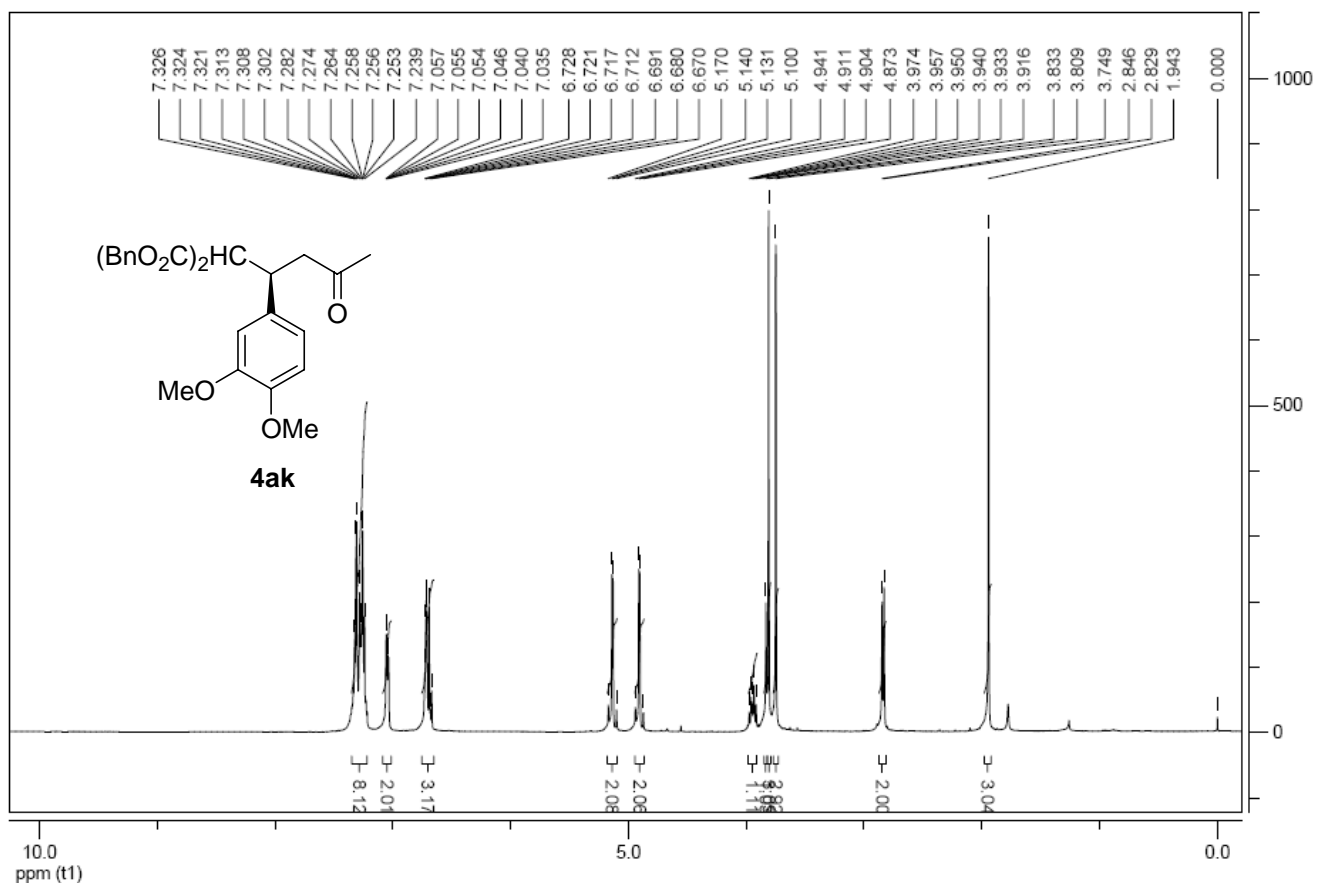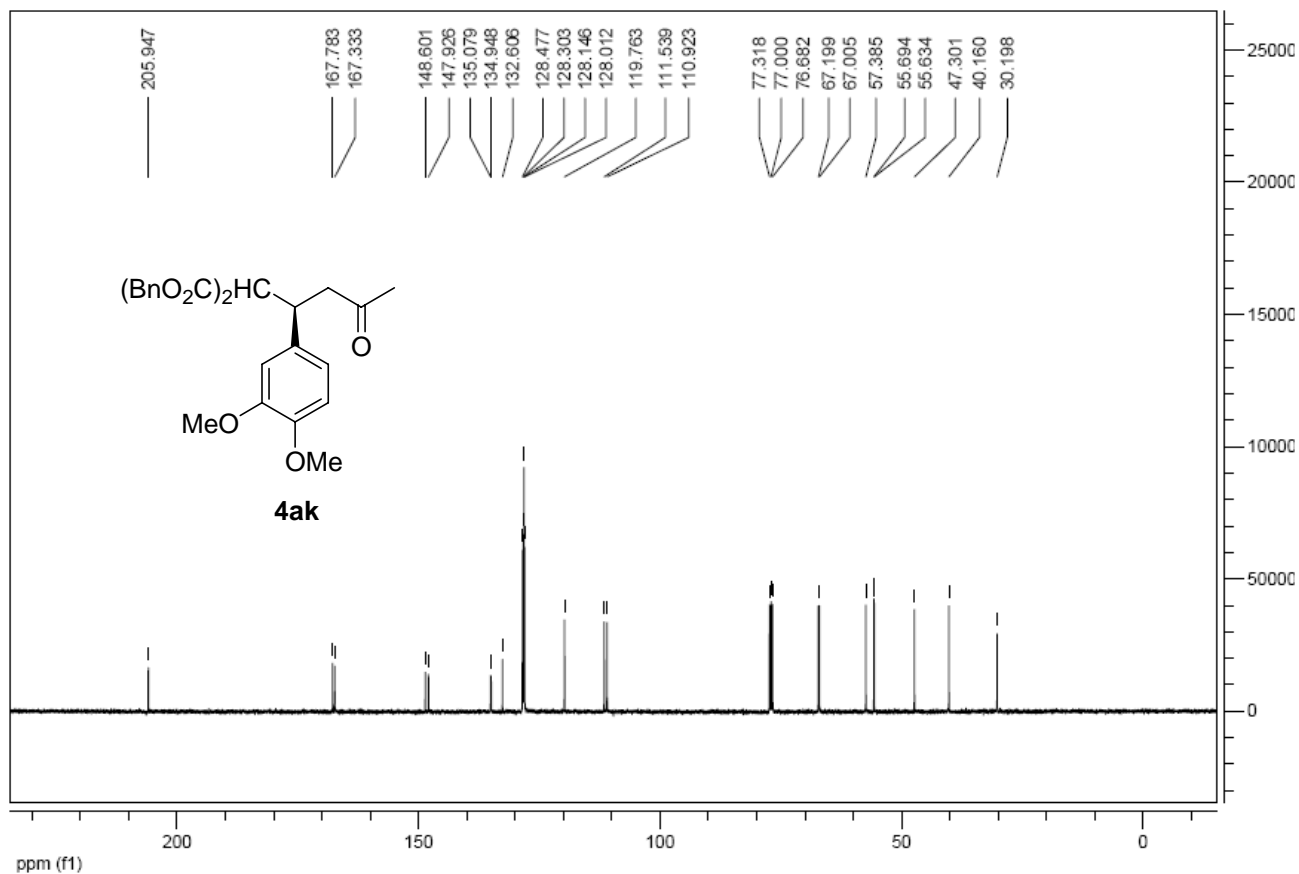

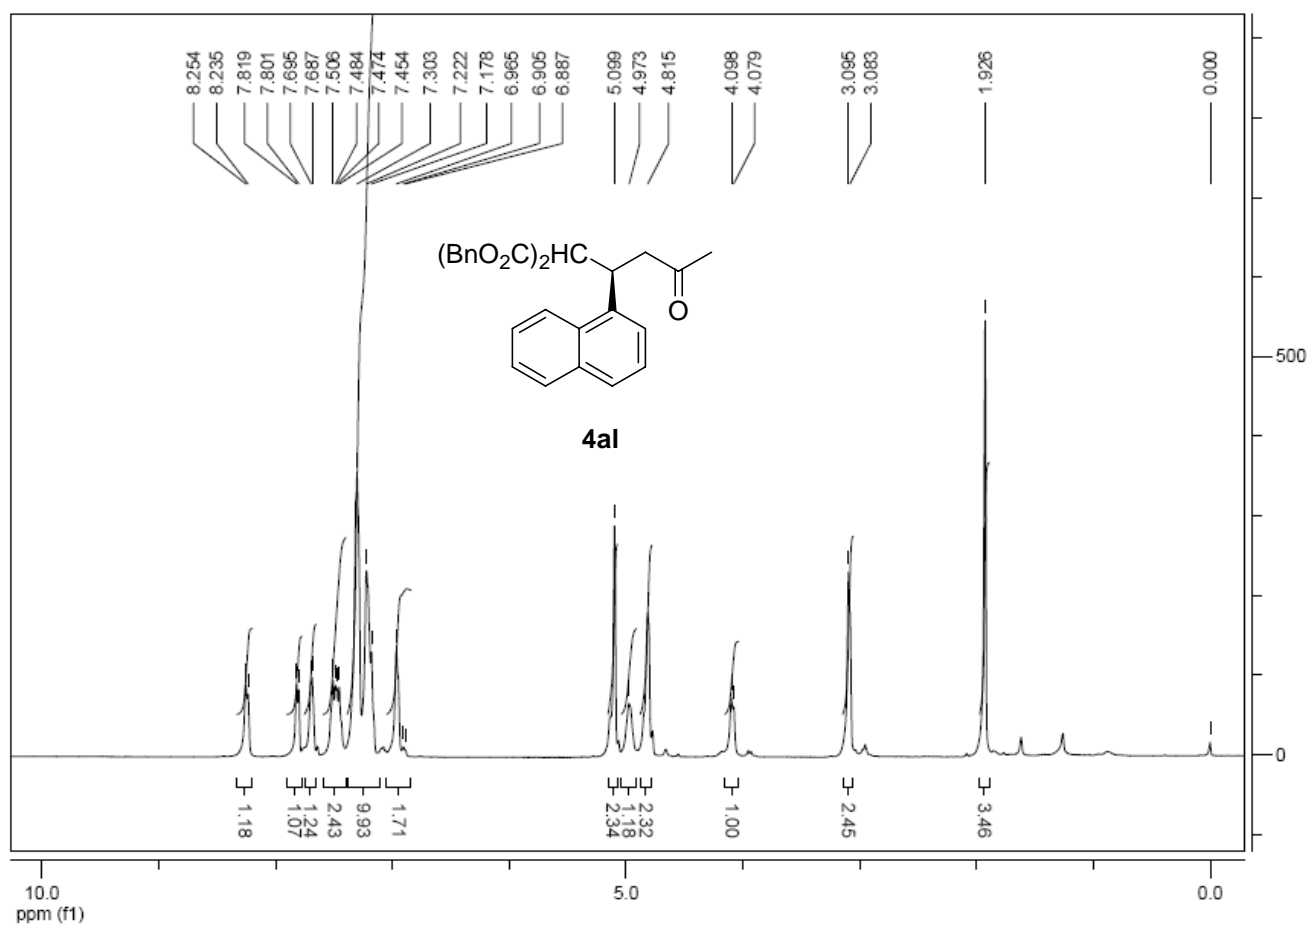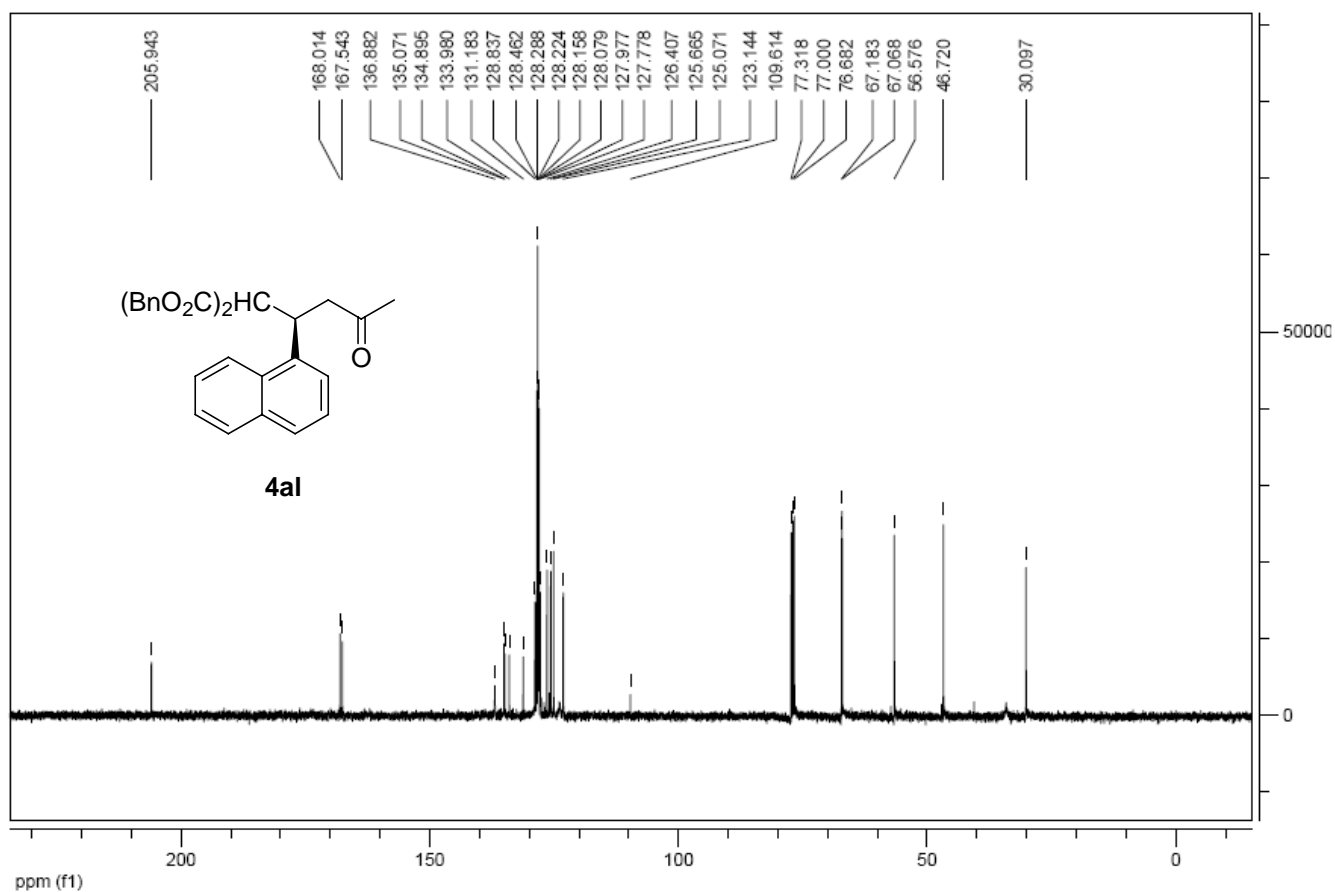

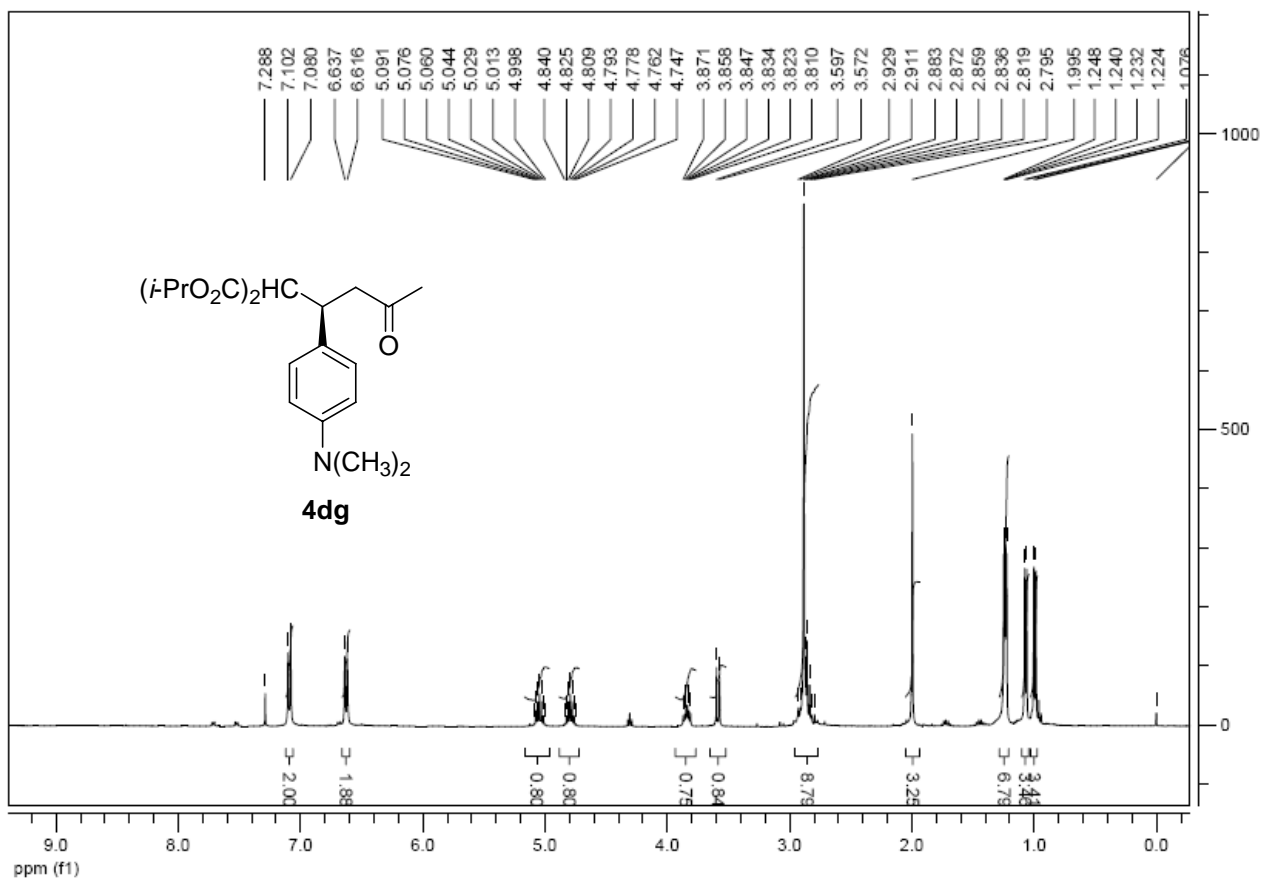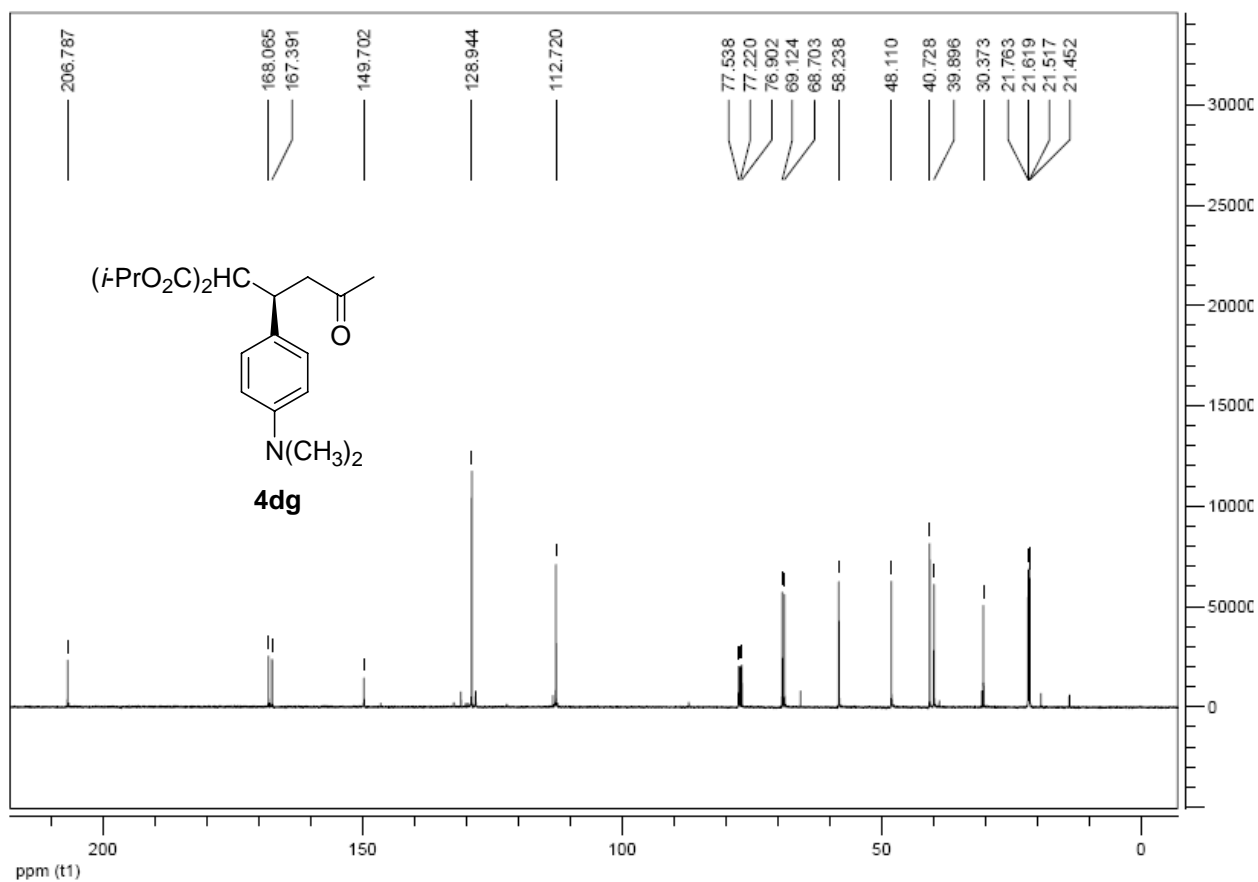

## Copies of HPLC chromatograms of Michael addition products

### HPLC chromatogram for compound **4aa**

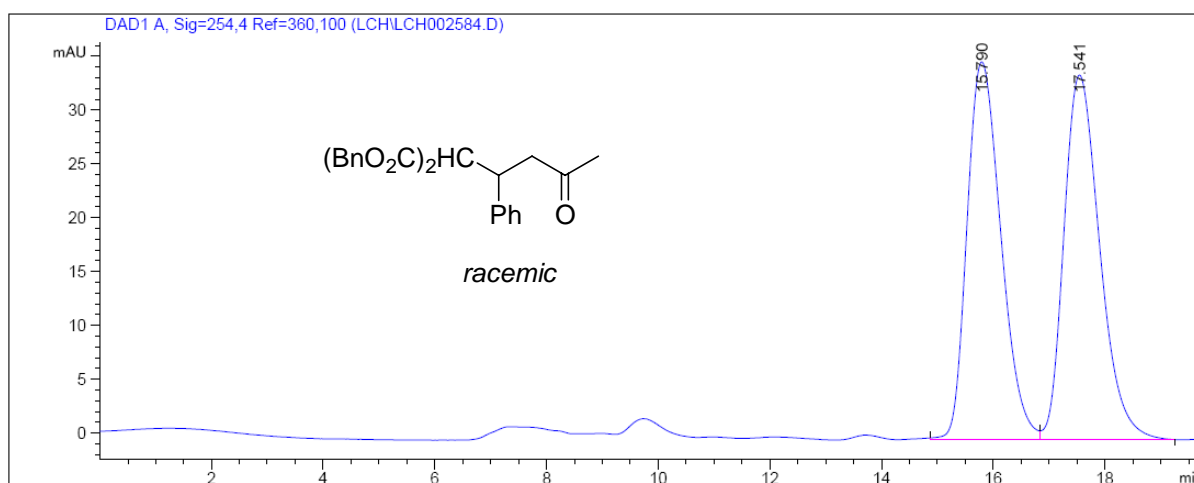

| Peak # | RetTime [min] | Type | Width [min] | Area [mAU*s] | Height [mAU] | Area %  |
|--------|---------------|------|-------------|--------------|--------------|---------|
| 峰 #    | 保留时间 [min]    | 类型   | 峰宽 [min]    | 峰面积 [mAU*s]  | 峰高 [mAU]     | 峰面积 %   |
| 1      | 15.790        | BV   | 0.6595      | 1477.98157   | 35.08599     | 49.4766 |
| 2      | 17.541        | VB   | 0.6922      | 1509.24915   | 33.85055     | 50.5234 |

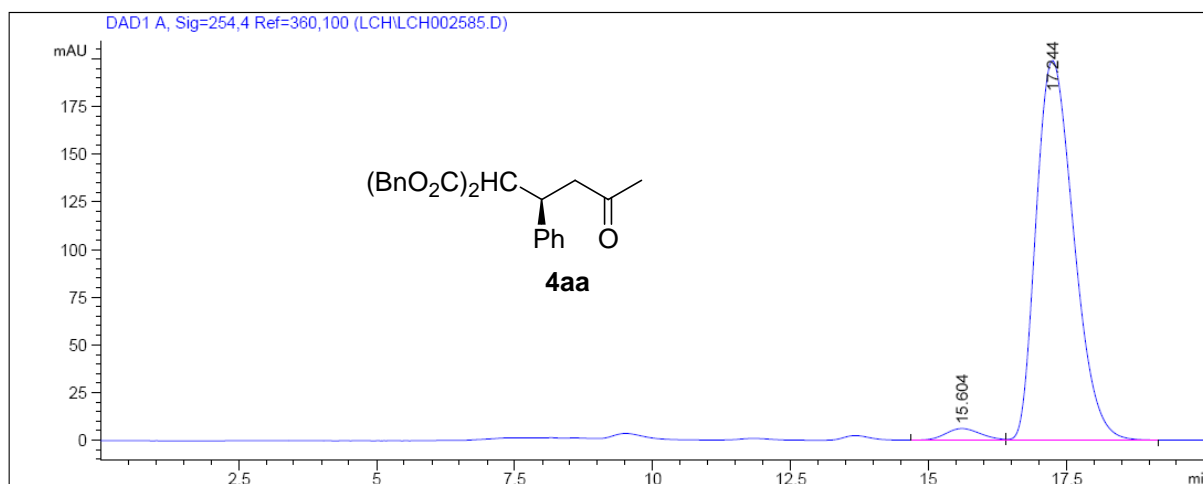

| Peak # | RetTime [min] | Type | Width [min] | Area [mAU*s] | Height [mAU] | Area %  |
|--------|---------------|------|-------------|--------------|--------------|---------|
| 峰 #    | 保留时间 [min]    | 类型   | 峰宽 [min]    | 峰面积 [mAU*s]  | 峰高 [mAU]     | 峰面积 %   |
| 1      | 15.604        | BV   | 0.7082      | 273.19742    | 6.12697      | 2.8112  |
| 2      | 17.244        | VB   | 0.7496      | 9445.12207   | 199.04536    | 97.1888 |



HPLC chromatogram for compound **4ab**

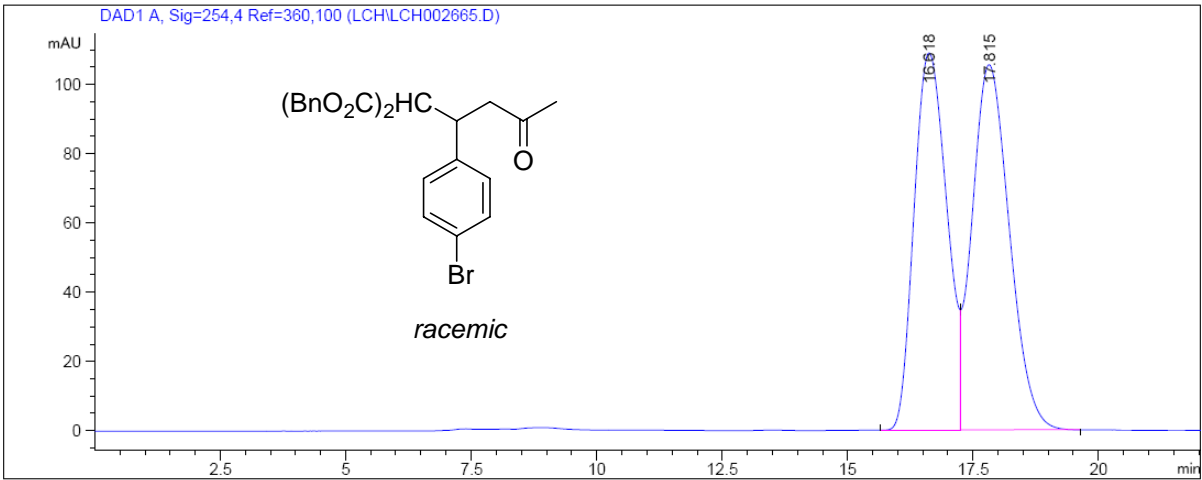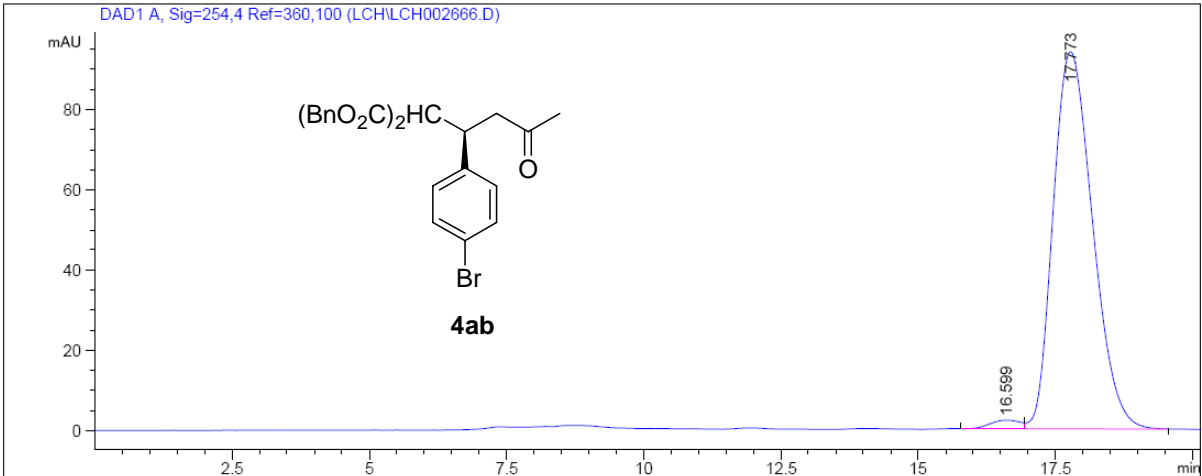

# HPLC chromatogram for compound **4ac**

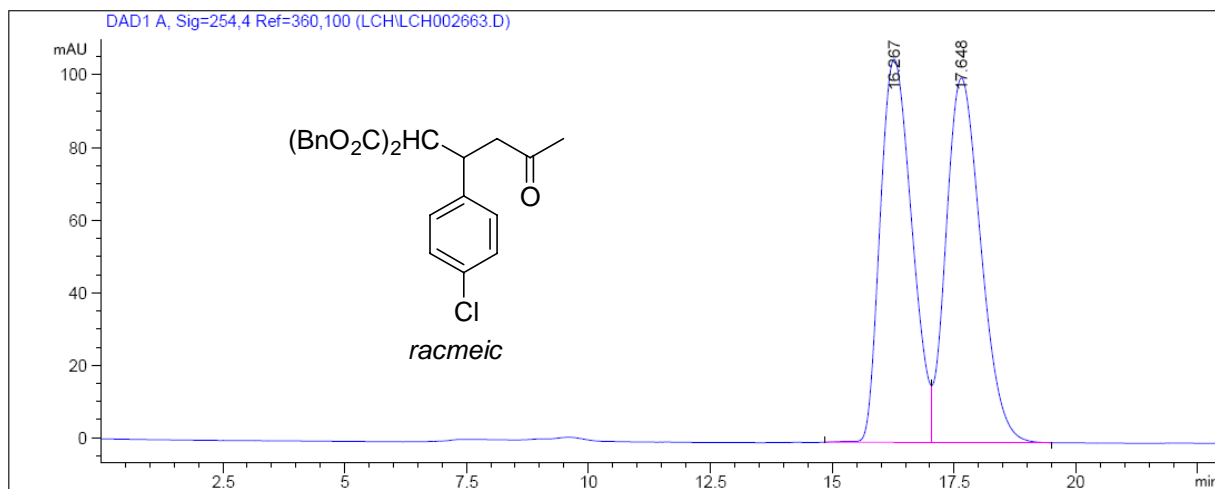

| Peak # | RetTime [min] | Type | Width [min] | Area [mAU*s] | Height [mAU] | Area %  |
|--------|---------------|------|-------------|--------------|--------------|---------|
| 峰 #    | 保留时间 [min]    | 类型   | 峰宽 [min]    | 峰面积 [mAU*s]  | 峰高 [mAU]     | 峰面积 %   |
| 1      | 16.267        | BV   | 0.7149      | 4769.00439   | 105.58973    | 48.8414 |
| 2      | 17.648        | VB   | 0.7761      | 4995.25977   | 100.46175    | 51.1586 |

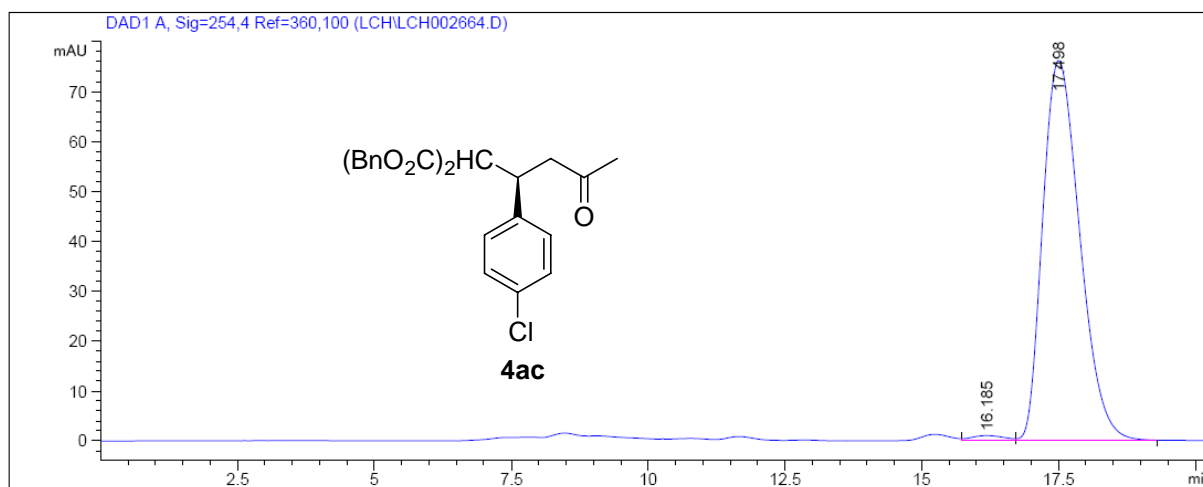

| Peak # | RetTime [min] | Type | Width [min] | Area [mAU*s] | Height [mAU] | Area %  |
|--------|---------------|------|-------------|--------------|--------------|---------|
| 峰 #    | 保留时间 [min]    | 类型   | 峰宽 [min]    | 峰面积 [mAU*s]  | 峰高 [mAU]     | 峰面积 %   |
| 1      | 16.185        | VV   | 0.5529      | 42.69107     | 1.01874      | 1.1767  |
| 2      | 17.498        | VB   | 0.7496      | 3585.46533   | 76.11748     | 98.8233 |

# HPLC chromatogram for compound **4ad**

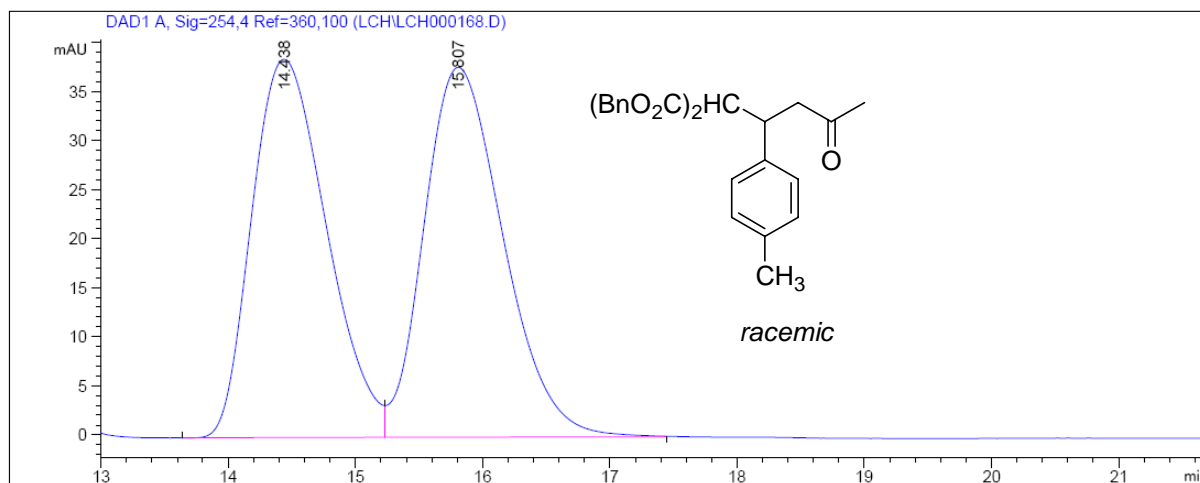

| Peak # | RetTime [min] | Type | Width [min] | Area [mAU*s] | Height [mAU] | Area %  |
|--------|---------------|------|-------------|--------------|--------------|---------|
| 1      | 14.438        | BV   | 0.6484      | 1575.32092   | 38.57943     | 49.0270 |
| 2      | 15.807        | VB   | 0.6824      | 1637.84619   | 37.73279     | 50.9730 |

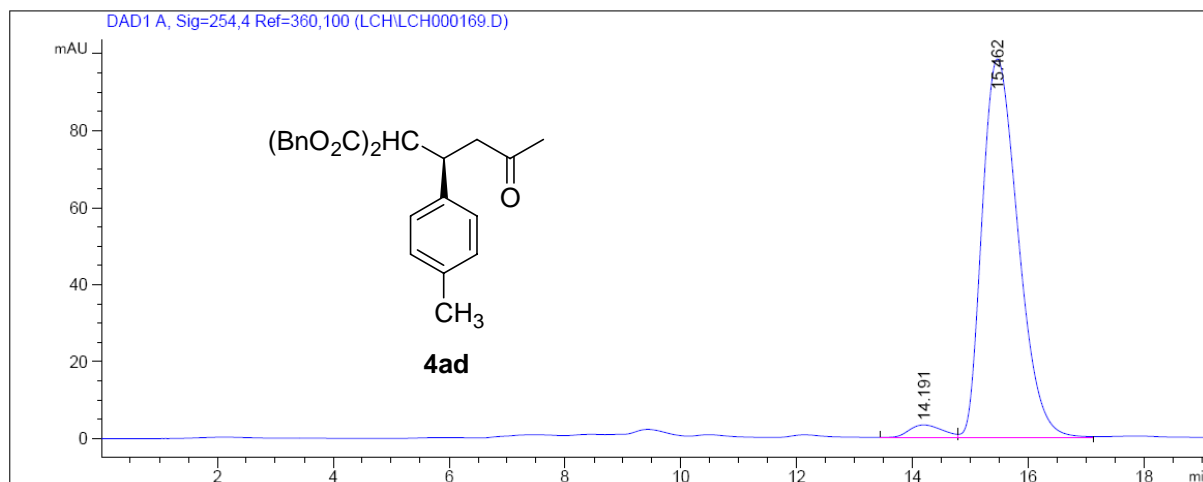

| Peak # | RetTime [min] | Type | Width [min] | Area [mAU*s] | Height [mAU] | Area %  |
|--------|---------------|------|-------------|--------------|--------------|---------|
| 1      | 14.191        | BV   | 0.5965      | 128.13028    | 3.24630      | 2.9379  |
| 2      | 15.462        | VB   | 0.6777      | 4233.14453   | 98.43730     | 97.0621 |

# HPLC chromatogram for compound **4ae**

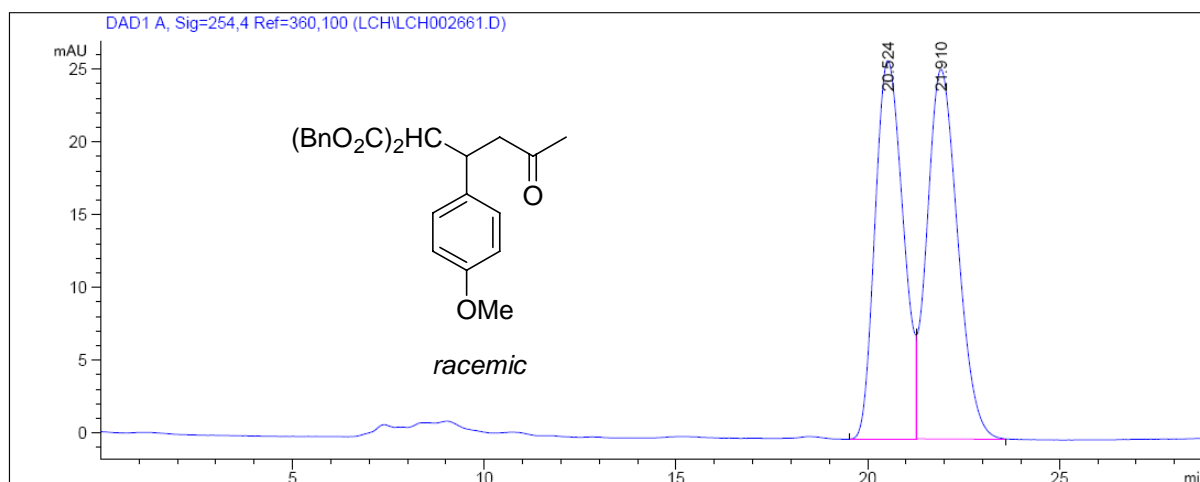

| Peak # | RetTime [min] | Type | Width [min] | Area [mAU*s] | Height [mAU] | Area %  |
|--------|---------------|------|-------------|--------------|--------------|---------|
| 峰 #    | 保留时间 [min]    | 类型   | 峰宽 [min]    | 峰面积 [mAU*s]  | 峰高 [mAU]     | 峰面积 %   |
| 1      | 20.524        | BV   | 0.8085      | 1321.59460   | 26.02495     | 48.1233 |
| 2      | 21.910        | VB   | 0.8655      | 1424.67200   | 25.43569     | 51.8767 |

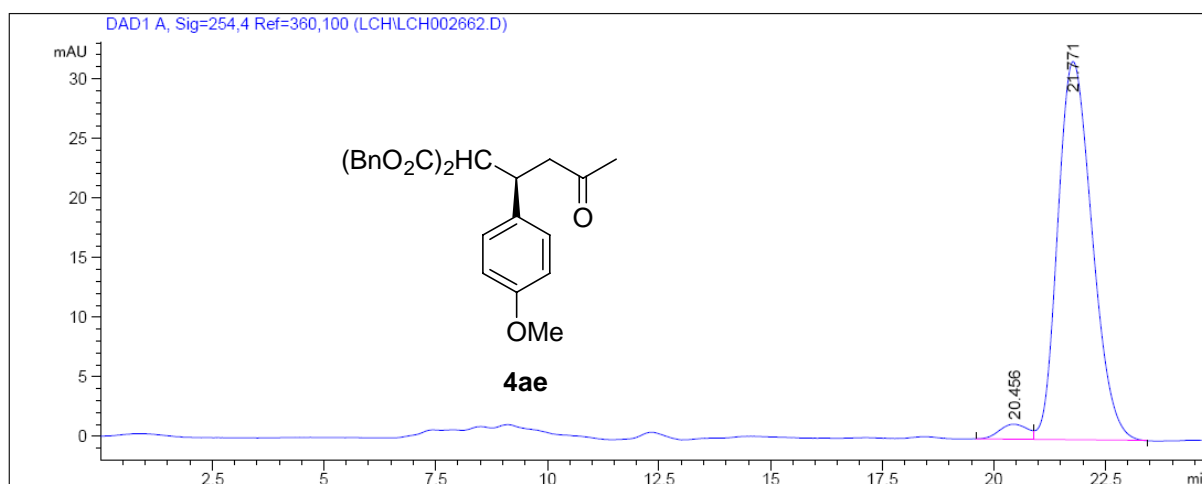

| Peak # | RetTime [min] | Type | Width [min] | Area [mAU*s] | Height [mAU] | Area %  |
|--------|---------------|------|-------------|--------------|--------------|---------|
| 峰 #    | 保留时间 [min]    | 类型   | 峰宽 [min]    | 峰面积 [mAU*s]  | 峰高 [mAU]     | 峰面积 %   |
| 1      | 20.456        | BV   | 0.5364      | 55.73545     | 1.26892      | 3.1772  |
| 2      | 21.771        | VB   | 0.8407      | 1698.47290   | 31.71951     | 96.8228 |

# HPLC chromatogram for compound **4af**

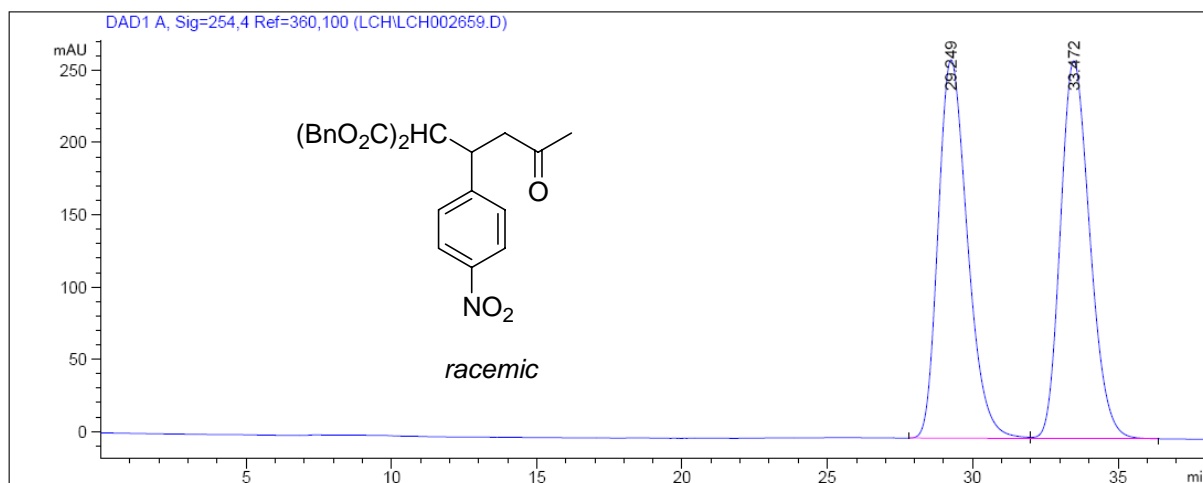

| Peak # | RetTime [min] | Type | Width [min] | Area [mAU*s] | Height [mAU] | Area %  |
|--------|---------------|------|-------------|--------------|--------------|---------|
| 峰 #    | 保留时间 [min]    | 类型   | 峰宽 [min]    | 峰面积 [mAU*s]  | 峰高 [mAU]     | 峰面积 %   |
| 1      | 29.249        | BV   | 1.0921      | 1.83204e4    | 261.90460    | 49.9019 |
| 2      | 33.472        | VB   | 1.0967      | 1.83924e4    | 261.46405    | 50.0981 |

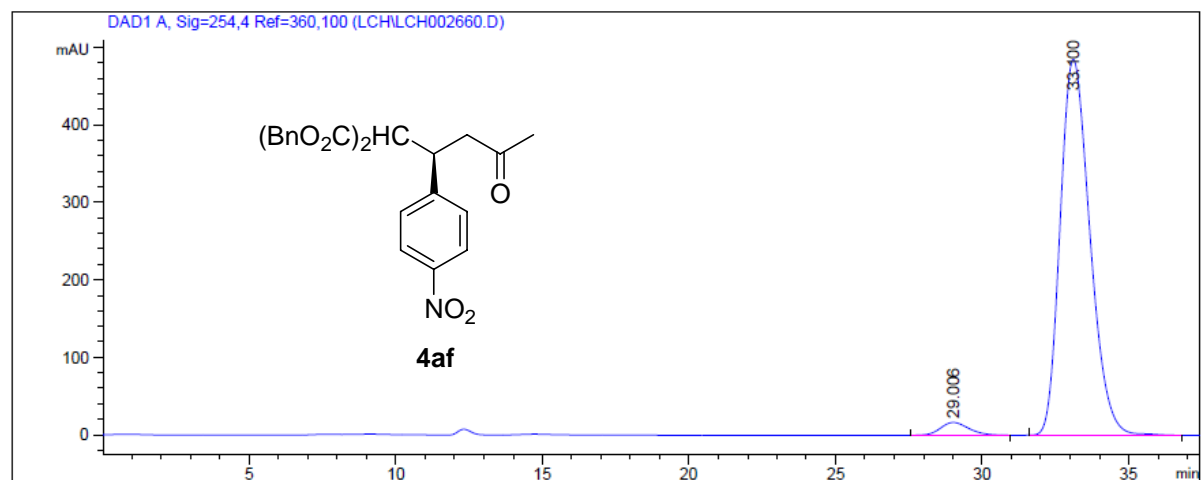

| Peak # | RetTime [min] | Type | Width [min] | Area [mAU*s] | Height [mAU] | Area %  |
|--------|---------------|------|-------------|--------------|--------------|---------|
| 峰 #    | 保留时间 [min]    | 类型   | 峰宽 [min]    | 峰面积 [mAU*s]  | 峰高 [mAU]     | 峰面积 %   |
| 1      | 29.006        | BB   | 1.0566      | 1152.77515   | 16.71489     | 3.2544  |
| 2      | 33.100        | BB   | 1.1034      | 3.42693e4    | 485.54865    | 96.7456 |

HPLC chromatogram for compound **4ag**

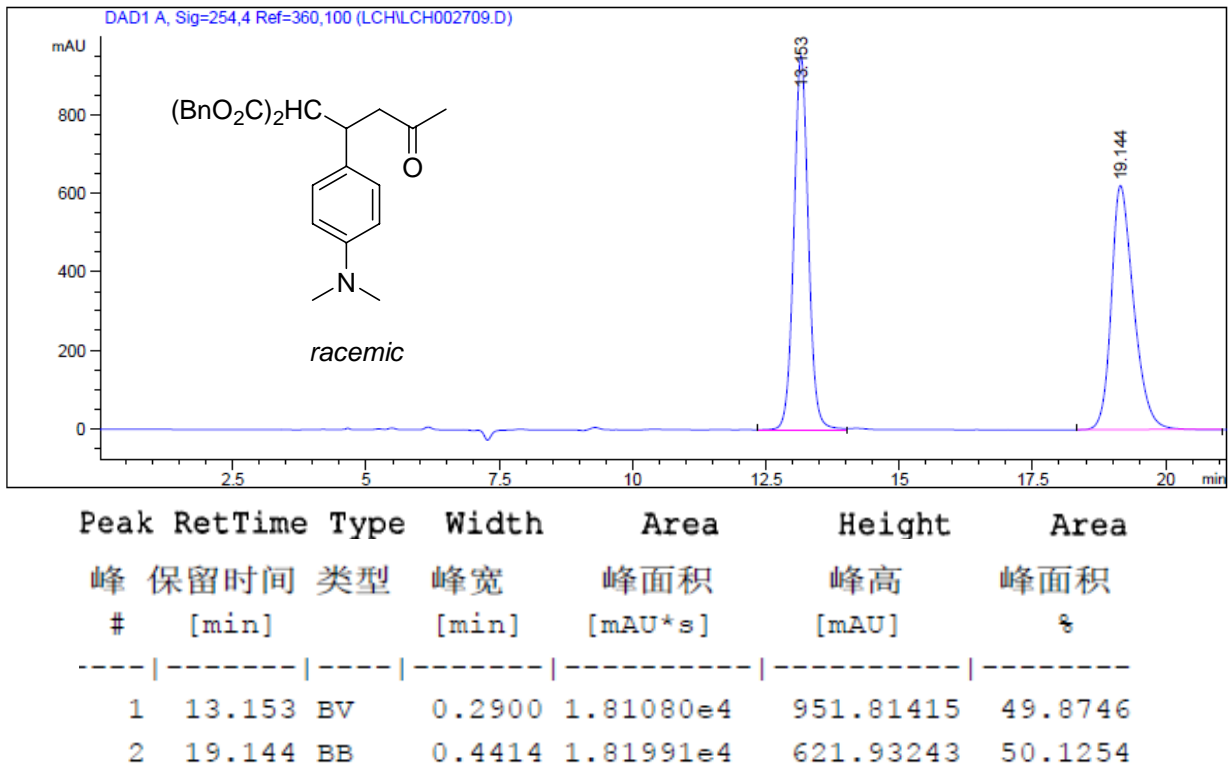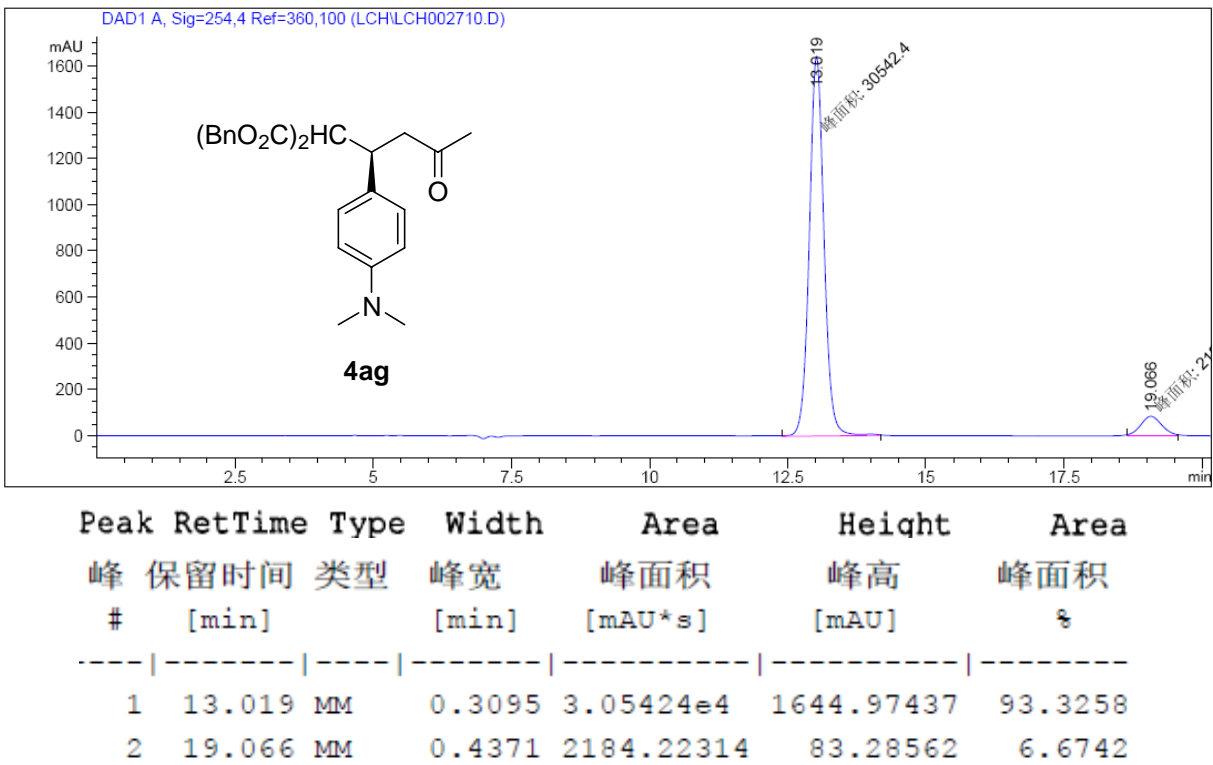

# HPLC chromatogram for compound **4ah**

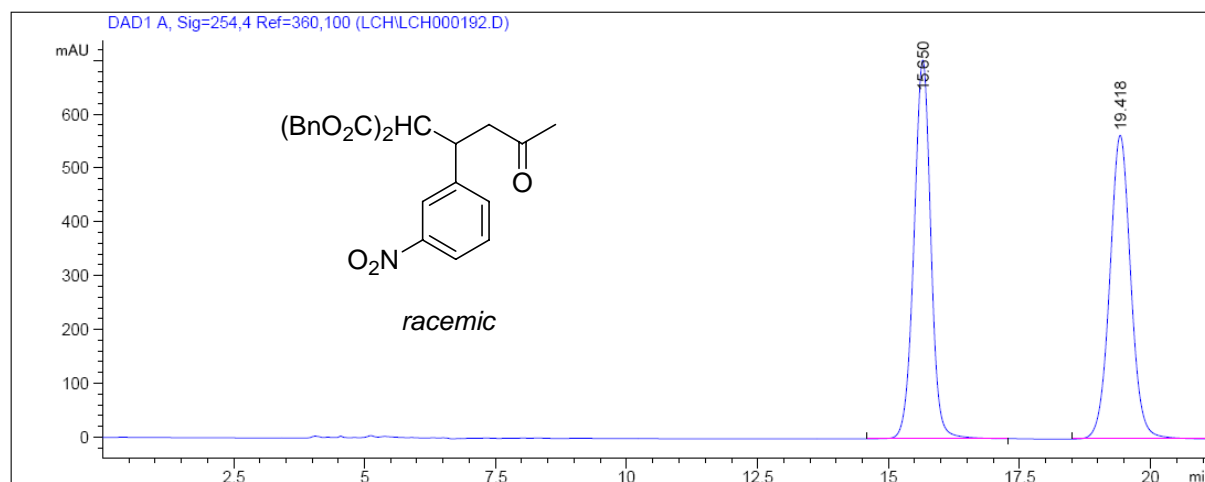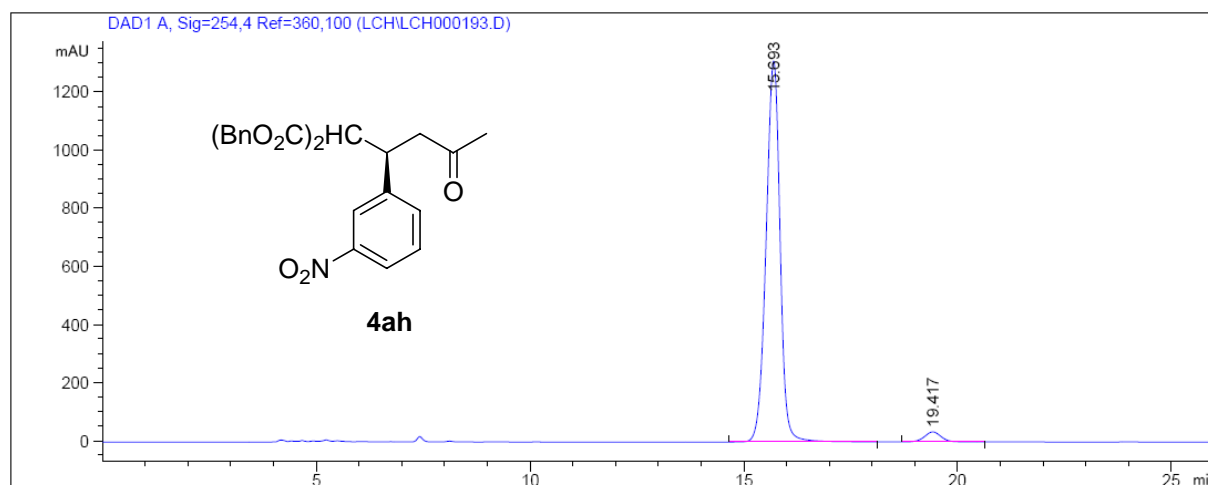

# HPLC chromatogram for compound **4ai**

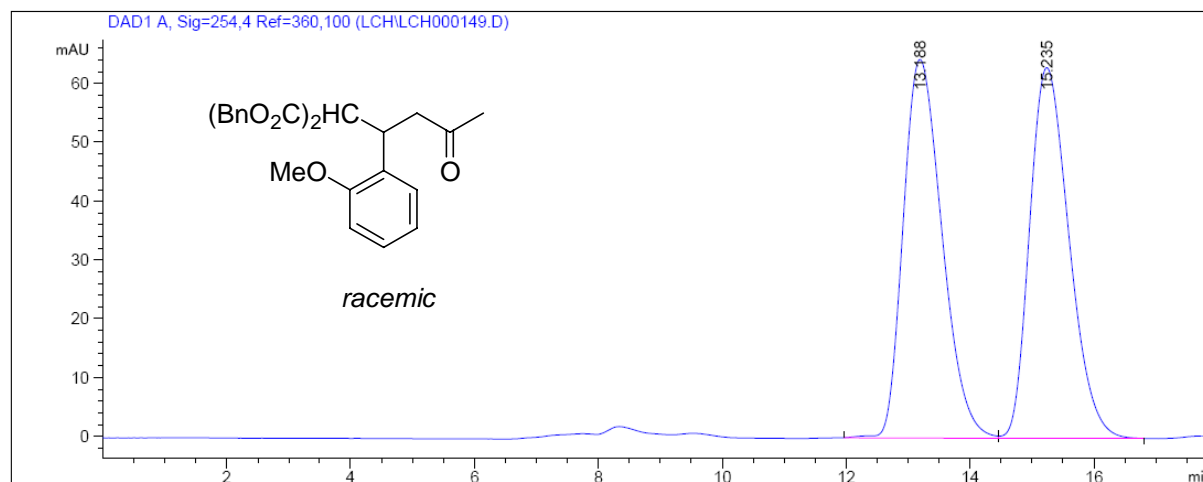

| Peak # | RetTime [min] | Type | Width [min] | Area [mAU*s] | Height [mAU] | Area %  |
|--------|---------------|------|-------------|--------------|--------------|---------|
| 峰 #    | 保留时间 [min]    | 类型   | 峰宽 [min]    | 峰面积 [mAU*s]  | 峰高 [mAU]     | 峰面积 %   |
| 1      | 13.188        | BV   | 0.6839      | 2804.17017   | 64.41107     | 50.1661 |
| 2      | 15.235        | VB   | 0.6955      | 2785.60327   | 63.04295     | 49.8339 |

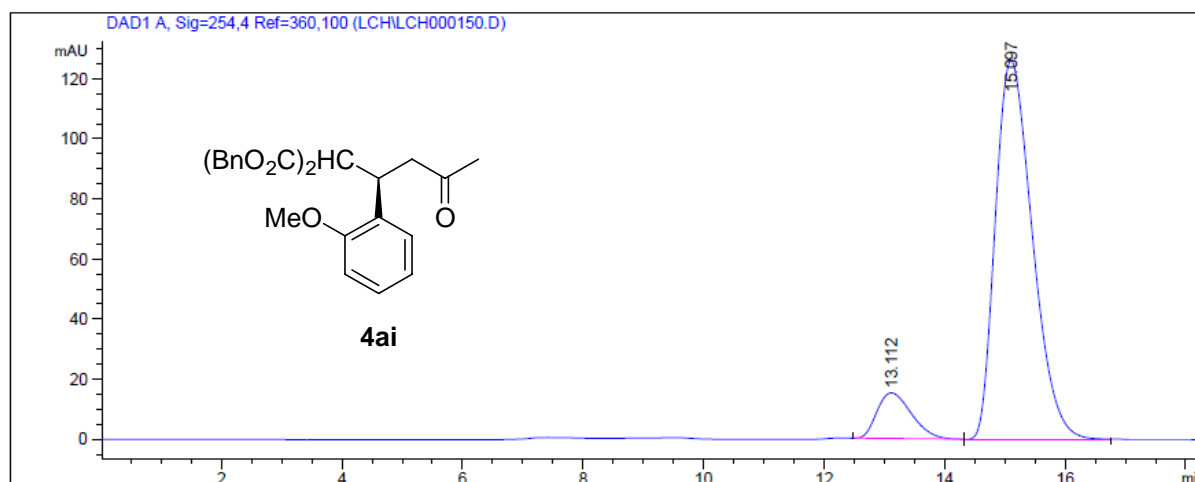

| Peak # | RetTime [min] | Type | Width [min] | Area [mAU*s] | Height [mAU] | Area %  |
|--------|---------------|------|-------------|--------------|--------------|---------|
| 峰 #    | 保留时间 [min]    | 类型   | 峰宽 [min]    | 峰面积 [mAU*s]  | 峰高 [mAU]     | 峰面积 %   |
| 1      | 13.112        | BV   | 0.6279      | 605.14868    | 15.22025     | 10.1176 |
| 2      | 15.097        | VB   | 0.6694      | 5376.00000   | 126.08524    | 89.8824 |



# HPLC chromatogram for compound **4aj**

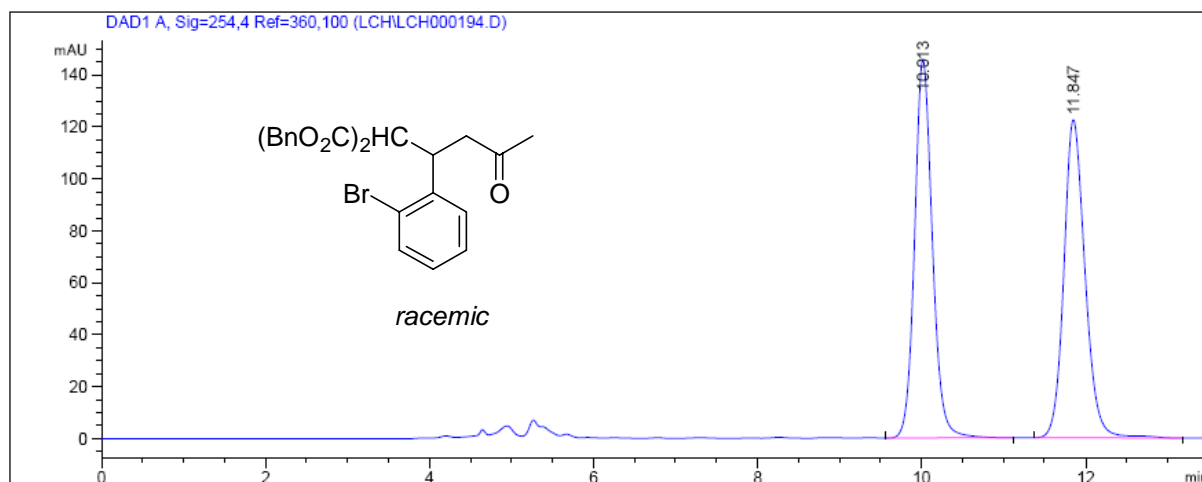

| Peak # | RetTime [min] | Type | Width [min] | Area [mAU*s] | Height [mAU] | Area %  |
|--------|---------------|------|-------------|--------------|--------------|---------|
| 峰 #    | 保留时间 [min]    | 类型   | 峰宽 [min]    | 峰面积 [mAU*s]  | 峰高 [mAU]     | 峰面积 %   |
| 1      | 10.013        | VB S | 0.2322      | 2197.98804   | 145.56929    | 49.9449 |
| 2      | 11.847        | BB   | 0.2739      | 2202.84082   | 122.45567    | 50.0551 |

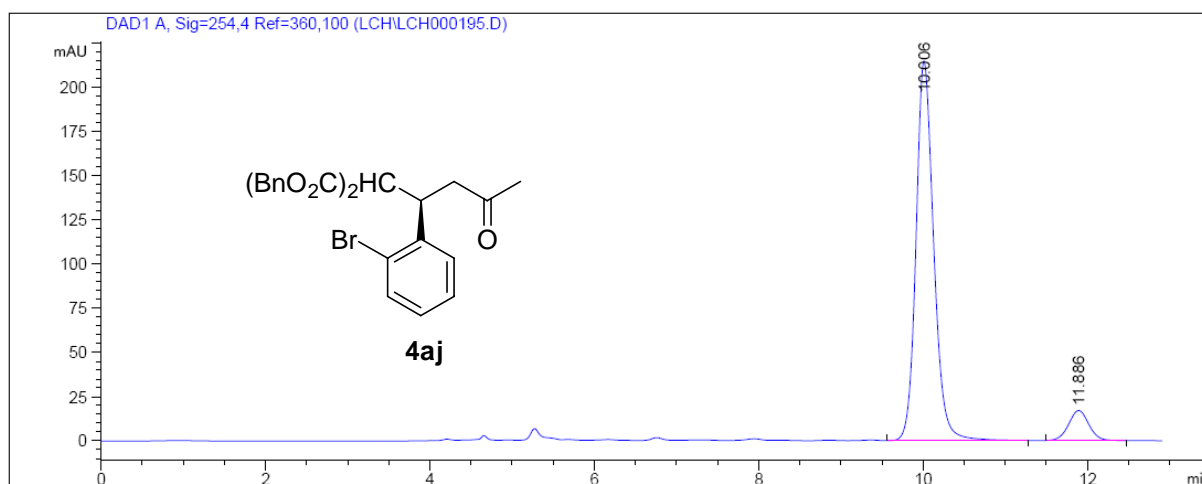

| Peak # | RetTime [min] | Type | Width [min] | Area [mAU*s] | Height [mAU] | Area %  |
|--------|---------------|------|-------------|--------------|--------------|---------|
| 峰 #    | 保留时间 [min]    | 类型   | 峰宽 [min]    | 峰面积 [mAU*s]  | 峰高 [mAU]     | 峰面积 %   |
| 1      | 10.006        | PB S | 0.2303      | 3207.23315   | 214.64417    | 91.7468 |
| 2      | 11.886        | BB   | 0.2626      | 288.51126    | 16.95054     | 8.2532  |

# HPLC chromatogram for compound **4ak**

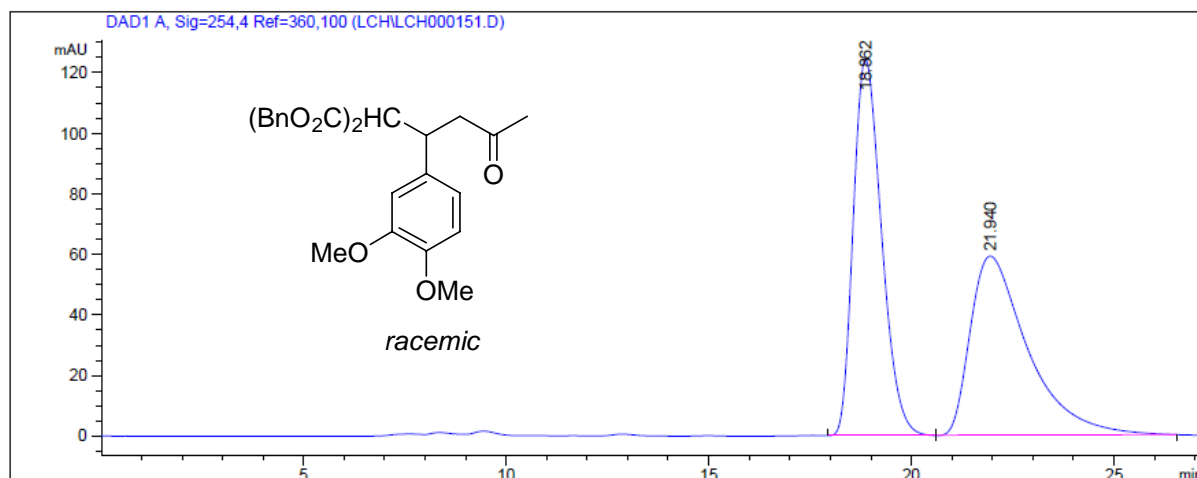

| Peak # | RetTime [min] | Type | Width [min] | Area [mAU*s] | Height [mAU] | Area %  |
|--------|---------------|------|-------------|--------------|--------------|---------|
| 1      | 18.862        | BV   | 0.7607      | 6019.65186   | 124.37415    | 50.6141 |
| 2      | 21.940        | VB   | 1.4757      | 5873.58252   | 59.29278     | 49.3859 |

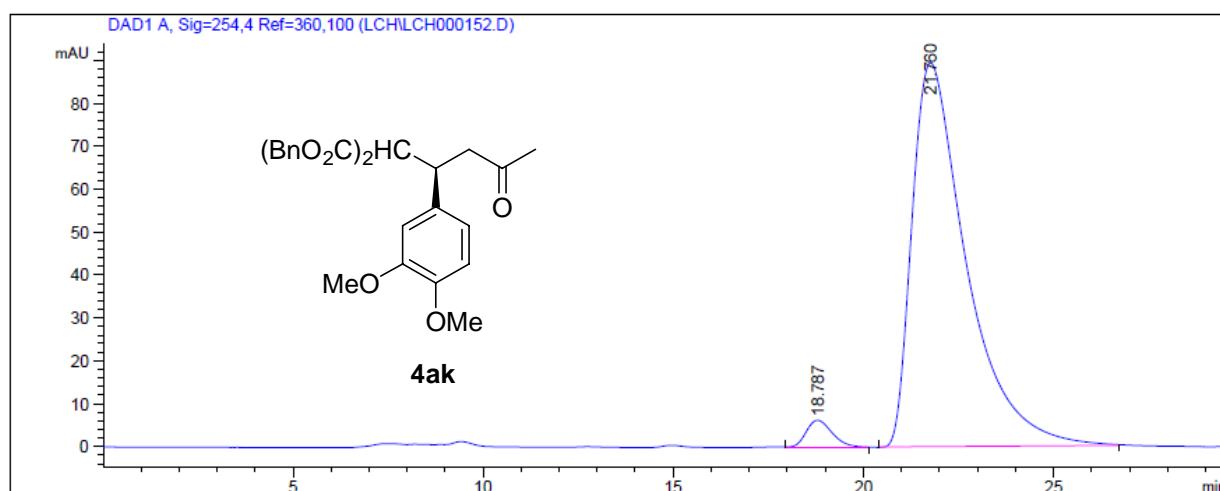

| Peak # | RetTime [min] | Type | Width [min] | Area [mAU*s] | Height [mAU] | Area %  |
|--------|---------------|------|-------------|--------------|--------------|---------|
| 1      | 18.787        | BB   | 0.7347      | 298.18439    | 6.27152      | 3.2387  |
| 2      | 21.760        | BB   | 1.4727      | 8908.75977   | 89.54342     | 96.7613 |

# HPLC chromatogram for compound **4al**

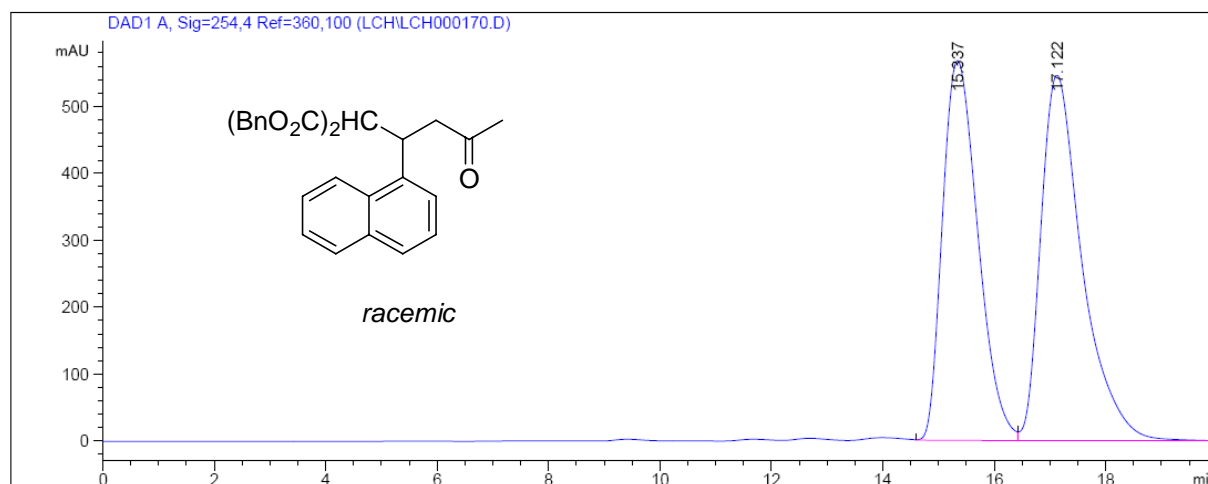

| Peak # | RetTime [min] | Type | Width [min] | Area [mAU*s] | Height [mAU] | Area %  |
|--------|---------------|------|-------------|--------------|--------------|---------|
| 峰 #    | 保留时间 [min]    | 类型   | 峰宽 [min]    | 峰面积 [mAU*s]  | 峰高 [mAU]     | 峰面积 %   |
| 1      | 15.337        | VV   | 0.6951      | 2.50691e4    | 567.80225    | 47.0838 |
| 2      | 17.122        | VV   | 0.7816      | 2.81744e4    | 546.41077    | 52.9162 |

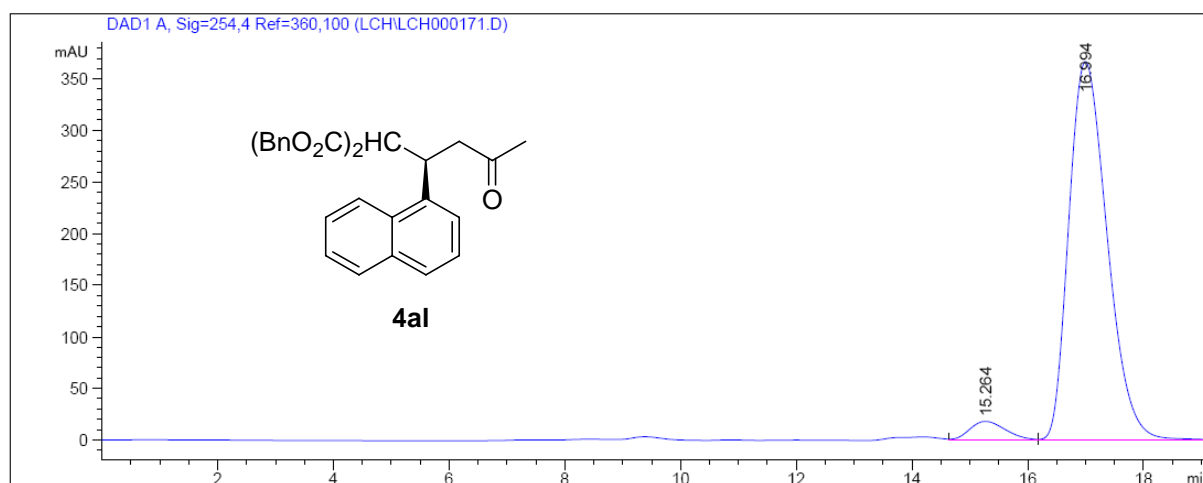

| Peak # | RetTime [min] | Type | Width [min] | Area [mAU*s] | Height [mAU] | Area %  |
|--------|---------------|------|-------------|--------------|--------------|---------|
| 峰 #    | 保留时间 [min]    | 类型   | 峰宽 [min]    | 峰面积 [mAU*s]  | 峰高 [mAU]     | 峰面积 %   |
| 1      | 15.264        | VV   | 0.6983      | 813.76093    | 18.46030     | 4.5817  |
| 2      | 16.994        | VBA  | 0.7266      | 1.69472e4    | 367.06653    | 95.4183 |

# HPLC chromatogram for compound **4am**

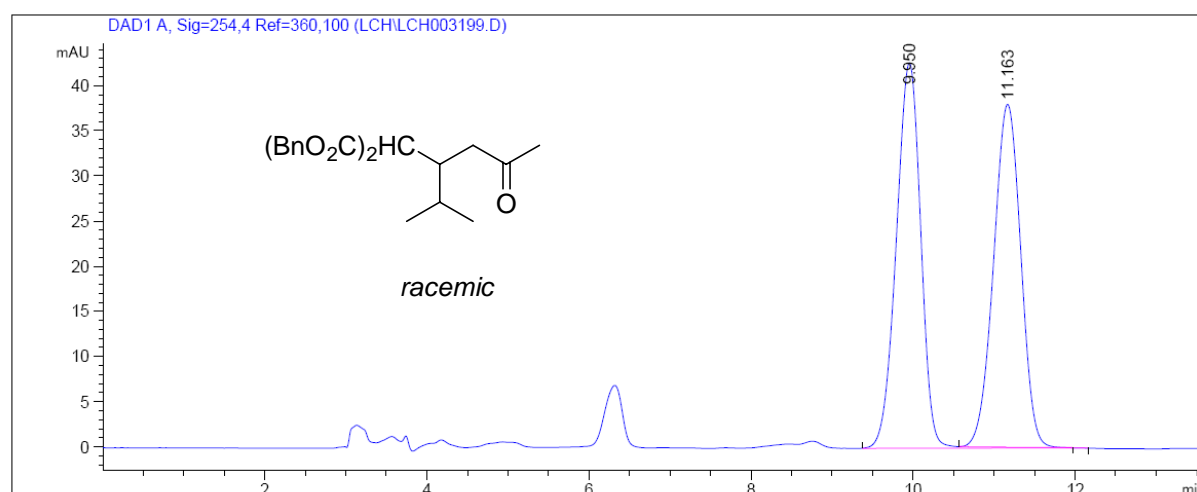

| Peak # | RetTime [min] | Type | Width [min] | Area [mAU*s] | Height [mAU] | Area %  |
|--------|---------------|------|-------------|--------------|--------------|---------|
| 1      | 9.950         | BB S | 0.3304      | 901.66962    | 42.69049     | 50.4305 |
| 2      | 11.163        | BB X | 0.3641      | 886.27496    | 37.99461     | 49.5695 |

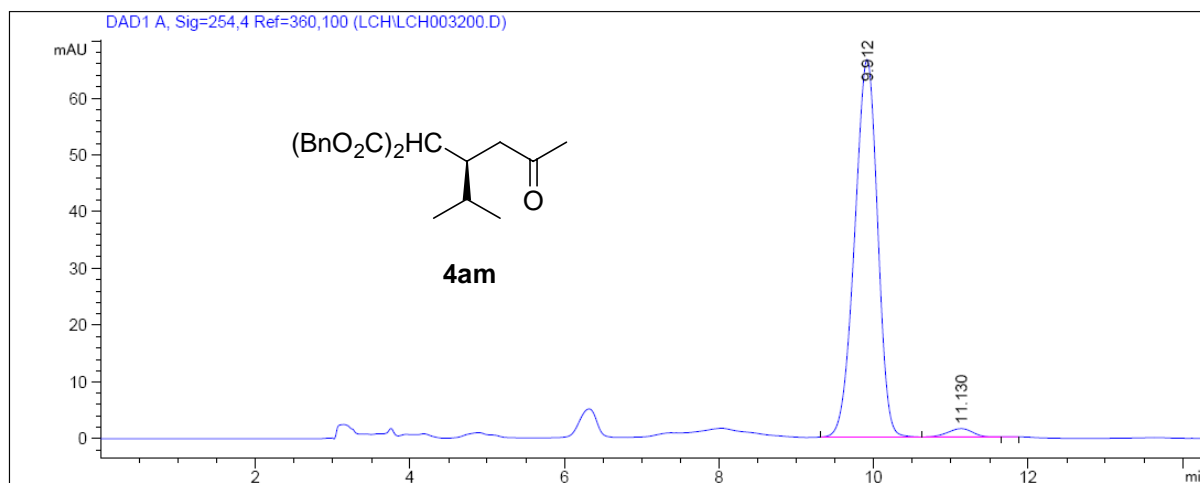

| Peak # | RetTime [min] | Type | Width [min] | Area [mAU*s] | Height [mAU] | Area %  |
|--------|---------------|------|-------------|--------------|--------------|---------|
| 1      | 9.912         | BB S | 0.3245      | 1371.35522   | 66.51813     | 97.6713 |
| 2      | 11.130        | BB T | 0.3440      | 32.69576     | 1.46719      | 2.3287  |

# HPLC chromatogram for compound **4an**

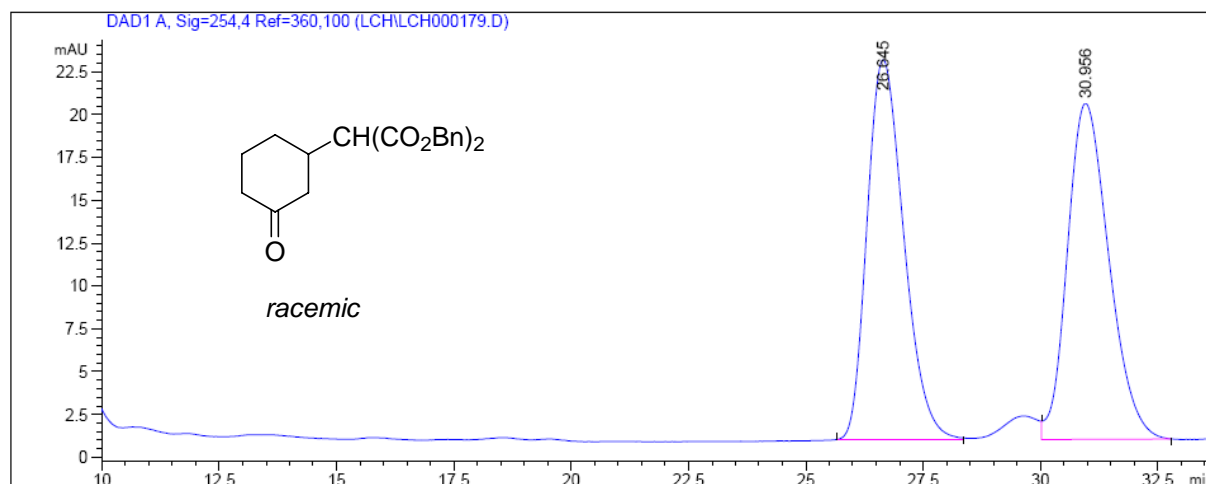

| Peak # | RetTime [min] | Type | Width [min] | Area [mAU*s] | Height [mAU] | Area %  |
|--------|---------------|------|-------------|--------------|--------------|---------|
| 1      | 26.645        | BB   | 0.8489      | 1212.50696   | 22.20929     | 50.0466 |
| 2      | 30.956        | VB   | 0.9551      | 1210.24756   | 19.63426     | 49.9534 |

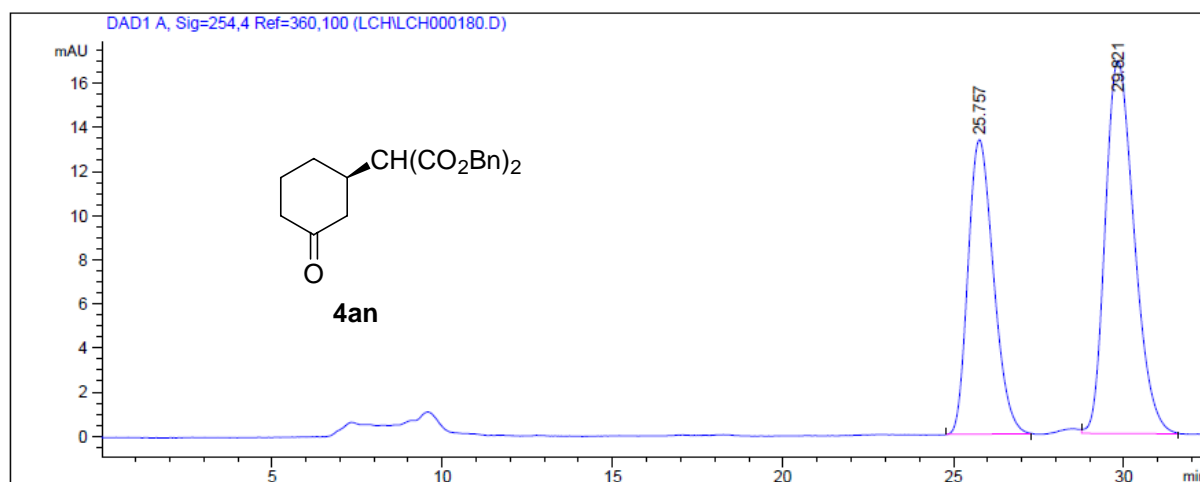

| Peak # | RetTime [min] | Type | Width [min] | Area [mAU*s] | Height [mAU] | Area %  |
|--------|---------------|------|-------------|--------------|--------------|---------|
| 1      | 25.757        | BB   | 0.8196      | 696.21313    | 13.36892     | 41.0491 |
| 2      | 29.821        | BB   | 0.9213      | 999.83459    | 16.92378     | 58.9509 |

# HPLC chromatogram for compound **4ba**

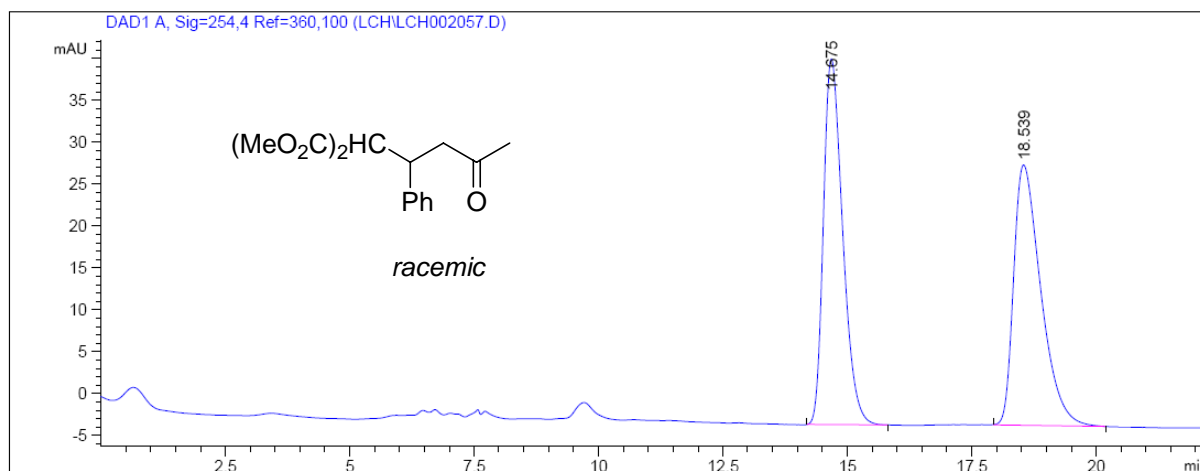

| Peak # | RetTime [min] | Type | Width [min] | Area [mAU*s] | Height [mAU] | Area %  |
|--------|---------------|------|-------------|--------------|--------------|---------|
| 峰 #    | 保留时间 [min]    | 类型   | 峰宽 [min]    | 峰面积 [mAU*s]  | 峰高 [mAU]     | 峰面积 %   |
| 1      | 14.675        | BB   | 0.4139      | 1173.74133   | 43.62328     | 49.8422 |
| 2      | 18.539        | BB   | 0.5795      | 1181.17200   | 31.07176     | 50.1578 |

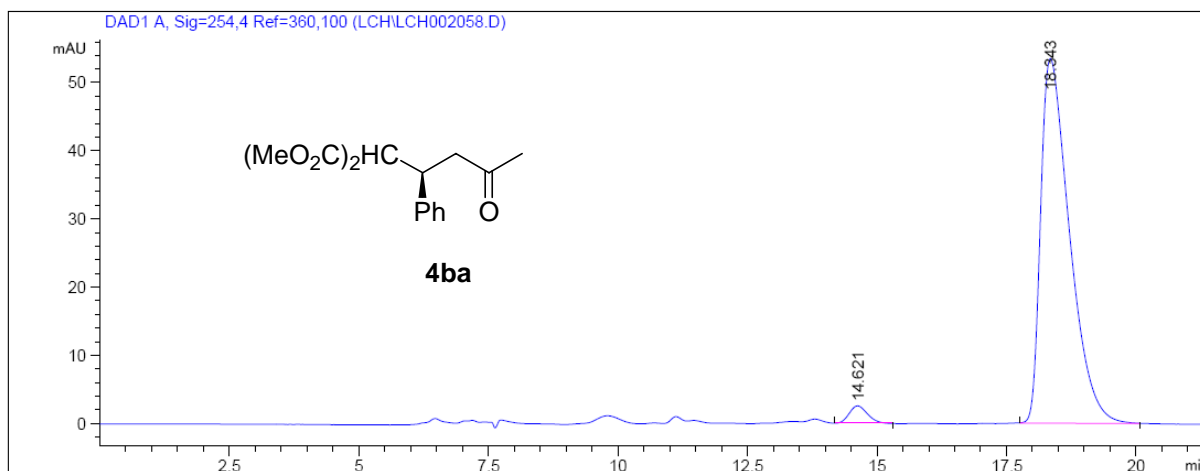

| Peak # | RetTime [min] | Type | Width [min] | Area [mAU*s] | Height [mAU] | Area %  |
|--------|---------------|------|-------------|--------------|--------------|---------|
| 峰 #    | 保留时间 [min]    | 类型   | 峰宽 [min]    | 峰面积 [mAU*s]  | 峰高 [mAU]     | 峰面积 %   |
| 1      | 14.621        | VB   | 0.3909      | 64.48955     | 2.58608      | 3.0095  |
| 2      | 18.343        | BB   | 0.5886      | 2078.35791   | 53.57192     | 96.9905 |

# HPLC chromatogram for compound **4ca**

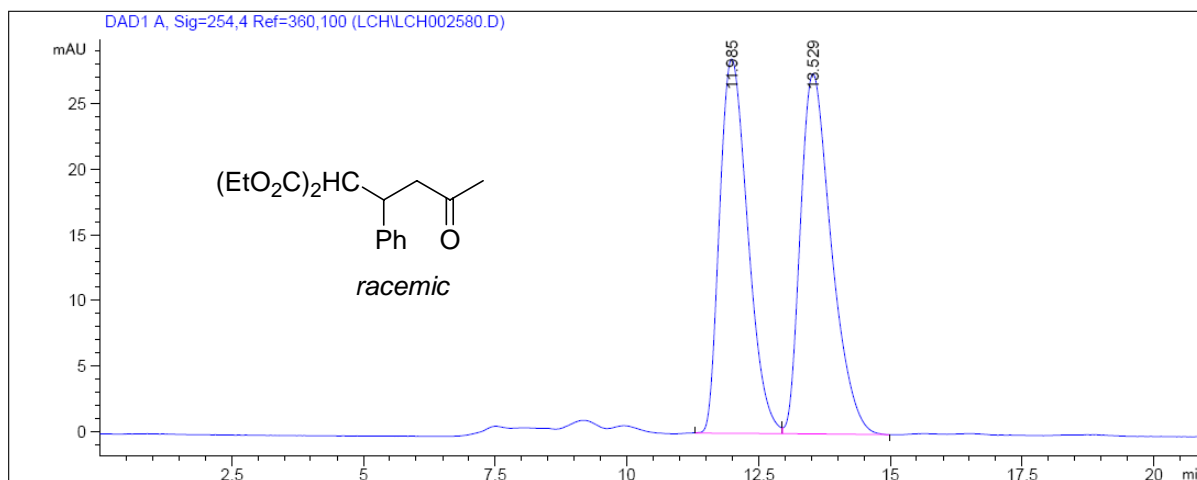

| Peak # | RetTime [min] | Type | Width [min] | Area [mAU*s] | Height [mAU] | Area %  |
|--------|---------------|------|-------------|--------------|--------------|---------|
| 峰 #    | 保留时间 [min]    | 类型   | 峰宽 [min]    | 峰面积 [mAU*s]  | 峰高 [mAU]     | 峰面积 %   |
| 1      | 11.985        | BV   | 0.5909      | 1064.45325   | 28.55466     | 48.6006 |
| 2      | 13.529        | VB   | 0.6221      | 1125.75159   | 27.47192     | 51.3994 |

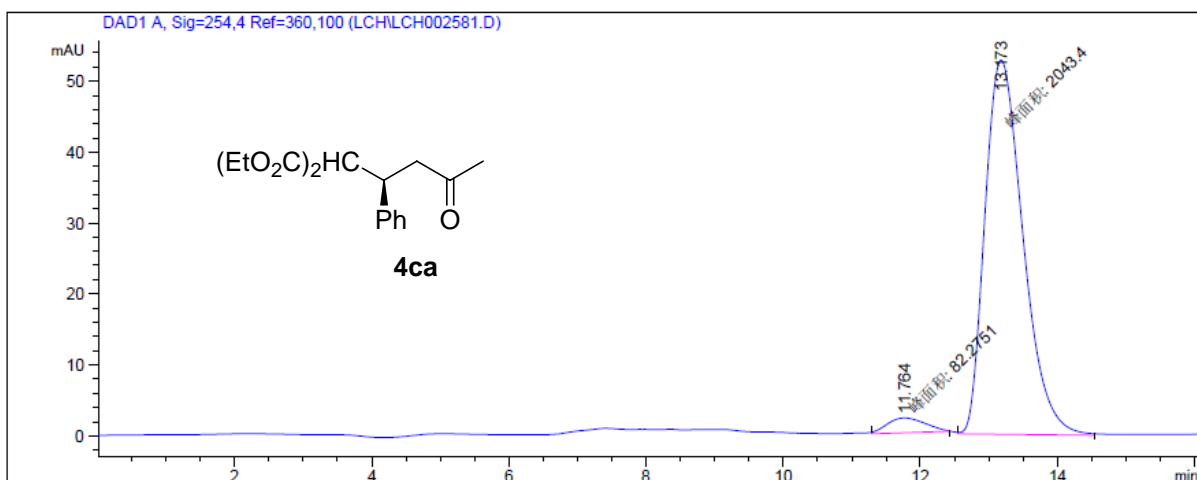

| Peak # | RetTime [min] | Type | Width [min] | Area [mAU*s] | Height [mAU] | Area %  |
|--------|---------------|------|-------------|--------------|--------------|---------|
| 峰 #    | 保留时间 [min]    | 类型   | 峰宽 [min]    | 峰面积 [mAU*s]  | 峰高 [mAU]     | 峰面积 %   |
| 1      | 11.764        | MM   | 0.6473      | 82.27506     | 2.11834      | 3.8705  |
| 2      | 13.173        | MM   | 0.6445      | 2043.39551   | 52.83878     | 96.1295 |

# HPLC chromatogram for compound **4da**

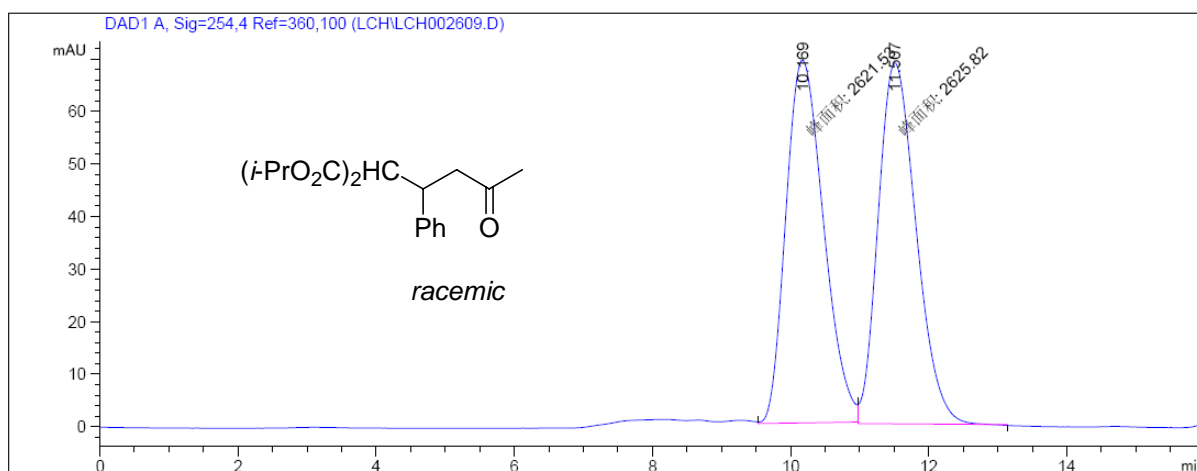

| Peak # | RetTime [min] | Type | Width [min] | Area [mAU*s] | Height [mAU] | Area %  |
|--------|---------------|------|-------------|--------------|--------------|---------|
| 峰 #    | 保留时间 [min]    | 类型   | 峰宽 [min]    | 峰面积 [mAU*s]  | 峰高 [mAU]     | 峰面积 %   |
| 1      | 10.169        | MM   | 0.6324      | 2621.52612   | 69.08685     | 49.9590 |
| 2      | 11.507        | MM   | 0.6367      | 2625.82446   | 68.73947     | 50.0410 |

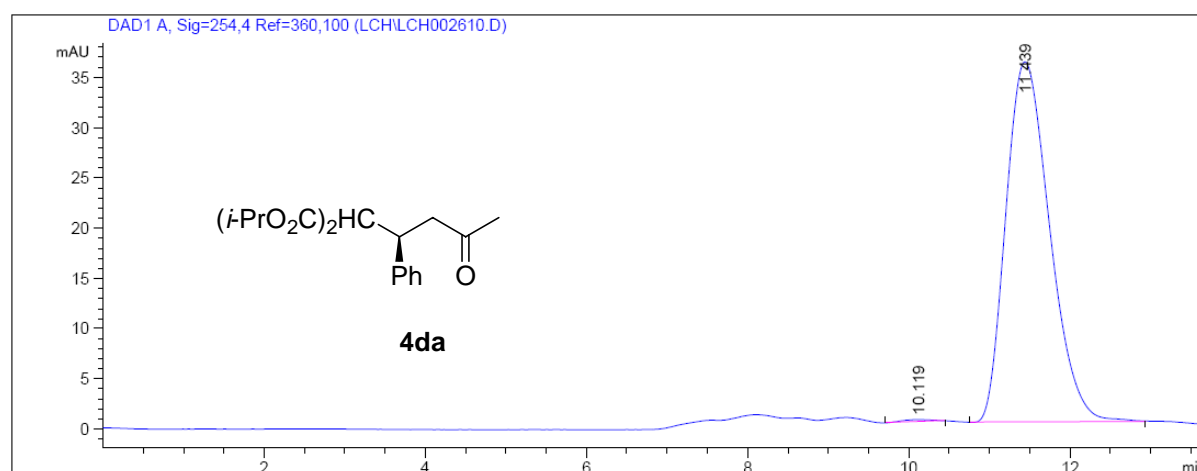

| Peak # | RetTime [min] | Type | Width [min] | Area [mAU*s] | Height [mAU] | Area %  |
|--------|---------------|------|-------------|--------------|--------------|---------|
| 峰 #    | 保留时间 [min]    | 类型   | 峰宽 [min]    | 峰面积 [mAU*s]  | 峰高 [mAU]     | 峰面积 %   |
| 1      | 10.119        | BB T | 0.3556      | 5.32928      | 2.02103e-1   | 0.3913  |
| 2      | 11.439        | BB   | 0.5934      | 1356.52148   | 35.85247     | 99.6087 |



# HPLC chromatogram for compound **4dg**

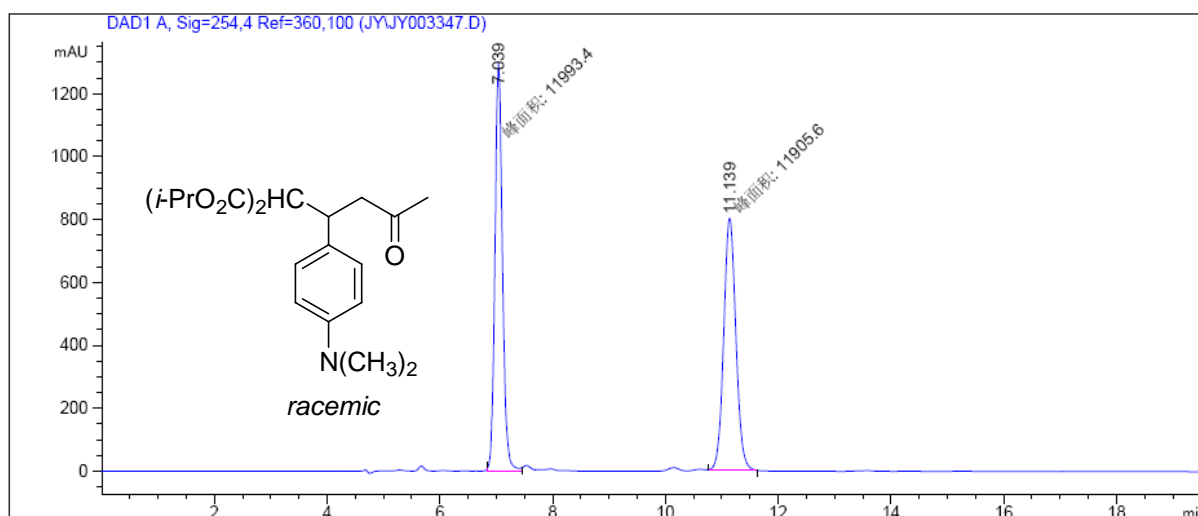

| Peak # | RetTime [min] | Type | Width [min] | Area [mAU*s] | Height [mAU] | Area %  |
|--------|---------------|------|-------------|--------------|--------------|---------|
| 1      | 7.039         | MM   | 0.1536      | 1.19934e4    | 1301.46594   | 50.1838 |
| 2      | 11.139        | MM   | 0.2477      | 1.19056e4    | 801.04590    | 49.8162 |

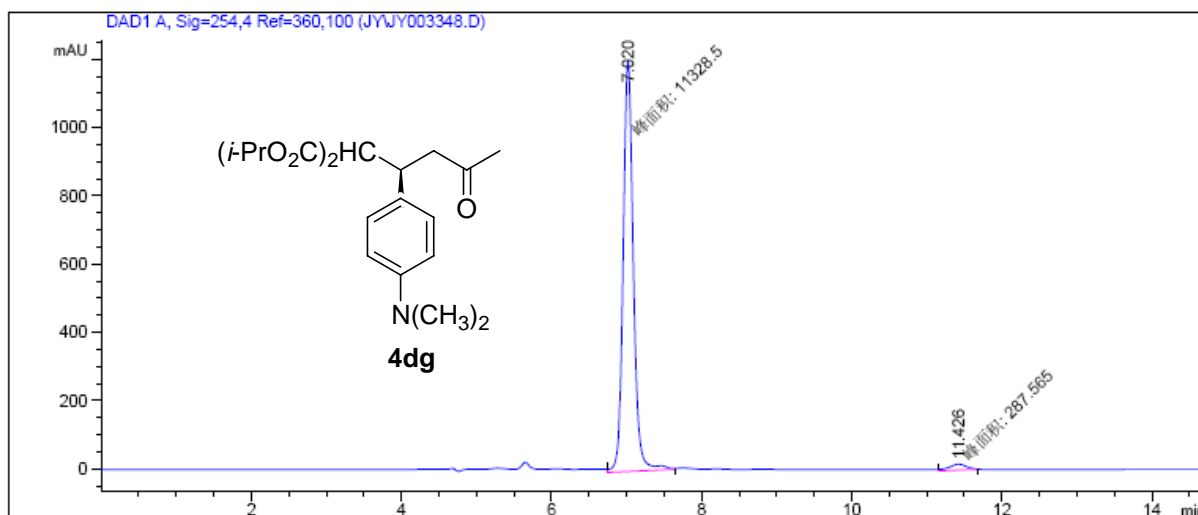

| Peak # | RetTime [min] | Type | Width [min] | Area [mAU*s] | Height [mAU] | Area %  |
|--------|---------------|------|-------------|--------------|--------------|---------|
| 1      | 7.020         | MM   | 0.1567      | 1.13285e4    | 1205.26868   | 97.5244 |
| 2      | 11.426        | MM   | 0.2749      | 287.56537    | 17.43642     | 2.4756  |
